1 **Senile plaques in Alzheimer's disease arise from Cathepsin D and A $\beta$ -enriched**  
2 **proteinaceous mixtures out of hemolysis and vascular degeneration**

3

4 Running title: The blood and vascular origin of senile plaques

5

6 Hualin Fu<sup>1,2\*</sup>, Jilong Li<sup>1</sup>, Peng Du<sup>3</sup>, Weilin Jin<sup>1,2,§</sup>, Guo Gao<sup>1,2</sup>, Daxiang Cui<sup>1,2</sup>

7

8 **Affiliations:**

9 <sup>1</sup> Institute of Nano Biomedicine and Engineering, Department of Instrument Science  
10 and Engineering, School of Electronic Information and Electrical Engineering,  
11 Shanghai Jiao Tong University, 800 Dongchuan Road, Shanghai, 200240, P. R. China

12 <sup>2</sup> National Center for Translational Medicine, Shanghai Jiao Tong University, 800  
13 Dongchuan Road, Shanghai, 200240, P. R. China

14 <sup>3</sup> Department of Colorectal Surgery, Xinhua Hospital, School of Medicine, Shanghai  
15 Jiao Tong University, Shanghai, China

16 <sup>§</sup> Current address: Institute of Cancer Neuroscience, Medical Frontier Innovation  
17 Research Center, The First Hospital of Lanzhou University, The First Clinical Medical  
18 College of Lanzhou University, Lanzhou 730000, China

19 \*Correspondence to: hfu@sjtu.edu.cn or 1010720220@qq.com (Hualin Fu)

20

21 **Abstract**

22

23 The senile plaque is a prominent pathological hallmark of Alzheimer's disease (AD),  
24 yet the mechanism governing senile plaque generation remains intensively debated.  
25 Many researchers believed that senile plaques are derived from neuronal cells; however,  
26 there is also strong evidence that senile plaques are linked to cerebral microhemorrhage.  
27 We analyzed major neural markers, blood vessel and blood markers on AD brain  
28 sections with immunohistochemistry, TUNEL assay, fluorescence imaging and  
29 histochemical staining. We found little co-expression between neural markers and

30 plaque A $\beta$  while abundant co-expression between blood markers such as HBA, HbA1C  
31 or ApoE and plaque A $\beta$ . Senile plaques additionally colocalized with a characteristic  
32 blue autofluorescence, which also prominently existed in red blood cells. Moreover,  
33 platelets were found along blood vessel walls and in plaques, suggesting that platelets  
34 also contribute to senile plaque formation. Senile plaque formation was intrinsically  
35 linked to vascular degeneration as showed by ColIV, ACTA2 and LRP1  
36 immunostaining. We found that A $\beta$  distributes unevenly among red cells or in the blood  
37 vessels, enriching in domains of red cell damage or vascular damage, and with the  
38 presence of luminal Cathepsin D expression. In addition, the senile plaques have a  
39 constitutive Cathepsin D expression overlapping with A $\beta$ , HBA and HbA1C, reiterating  
40 a senile plaque connection with hemolysis. With Rhodanine staining, we further proved  
41 that there is widespread hemolysis in AD brain tissues, which concurs with A $\beta$   
42 aggregation, Cathepsin D and ApoE expression. Moreover, we provided the  
43 biochemical evidence that A $\beta$  directly interacts with hemoglobin (Hb) and form  
44 protease-sensitive complexes in an *in vitro* polymerization assay. In summary, our data  
45 suggested that senile plaques arise from Cathepsin D and A $\beta$ -enriched proteinaceous  
46 mixtures out of hemolysis and vascular degeneration. In addition, hemoglobin could be  
47 a primary physiological target of A $\beta$  in hemolysis and in senile plaques.

48

49 **Keywords:** senile plaque; A $\beta$ ; Cathepsin D; hemolysis; vascular degeneration ;  
50 hemoglobin; Alzheimer's disease

51

## 52 **Introduction**

53

54 Alzheimer's disease has several important pathological hallmarks such as senile plaques,  
55 dystrophic neurites, neurofibrillary tangles and cerebral amyloid angiopathy (CAA)<sup>1-4</sup>.  
56 Beta amyloid peptide (A $\beta$ ) turned out to be a major component in both senile plaques  
57 and CAA<sup>5,6</sup>. However, the mechanism governing A $\beta$  generation in senile plaques and  
58 the linkage between CAA and senile plaques is still not clear. Most researchers believed  
59 that senile plaques are derived from neuronal cells as proposed in amyloid cascade

60 hypothesis<sup>7,8</sup>. On the other hand, there is also strong evidence showing that senile  
61 plaques are linked with cerebral microhemorrhage<sup>9-18</sup>. In depth AD mouse model  
62 studies based on bone marrow transplantation experiments also indicated that there is a  
63 clear role of hematopoietic cell A $\beta$  contributing to senile plaque development<sup>19</sup>. We  
64 used immunohistochemistry, fluorescence imaging, TUNEL assay and histochemical  
65 staining to examine the neural, vascular or blood A $\beta$  contribution to senile plaque  
66 development in AD brain tissues. We found that there is a lack of significant direct  
67 neural cell A $\beta$  input to senile plaques. The true direct source of senile plaque A $\beta$  appears  
68 to be A $\beta$ -associated hemolytic red blood cells that come out of cerebral blood vessels  
69 through vascular leakage or vascular degeneration while CAA is an important  
70 intermediate stage during this senile plaque formation process.

71

## 72 **MATERIAL AND METHODS**

73

74 **Tissue sections.** AD patient frontal lobe brain paraffin tissue sections were purchased  
75 from GeneTex (Irvine, CA, USA). Additionally, AD patient frontal lobe brain paraffin  
76 tissue sections were provided by National Human Brain Bank for Development and  
77 Function, Chinese Academy of Medical Sciences and Peking Union Medical College,  
78 Beijing, China. This study was supported by the Institute of Basic Medical Sciences,  
79 Chinese Academy of Medical Sciences, Neuroscience Center, and the China Human  
80 Brain Banking Consortium. All procedures involving human subjects are done in  
81 accord with the ethical standards of the Committee on Human Experimentation in  
82 Shanghai Jiao Tong University and in Xinhua Hospital, and in accord with the Helsinki  
83 Declaration of 1975.

84

85 **List of antibodies for immunohistochemistry.** The following primary antibodies and  
86 dilutions have been used in this study: A $\beta$  (Abcam ab201061, 1:200), A $\beta$ /A $\beta$ PP (CST  
87 #2450, 1:200), phos-TAU (Abcam ab151559, 1:200),  $\alpha$ Syn (Proteintech 10842-1-AP,

88 1:200), MAP2 (Proteintech 17490-1-AP, 1:200), GFAP (Abcam ab33922, 1:200),  
89 GFAP (Proteintech 60190-1-Ig, 1:100), Iba1 (Abcam ab178847, 1:200), ColIV (Abcam  
90 ab236640, 1:200), ACTA2 (Proteintech 23081-1-AP, 1:400), LRP1 (Abcam ab92544,  
91 1:200), ApoE (Abcam ab183597, 1:200), CD42b (Abcam ab210407, 1:200), HBA  
92 (Abcam ab92492, 1:200), Anti-Glycophorin A antibody (Abcam ab129024, 1:200),  
93 Cathepsin D (Proteintech 66534-1-Ig, 1:100), Cathepsin D (Abcam ab75852, 1:200),  
94 HbA1c (OkayBio K5a2, 1:100). The following secondary antibodies and dilutions have  
95 been used in this study: donkey anti-mouse Alexa-594 secondary antibody (Jackson  
96 ImmunoResearch 715-585-150, 1:400), donkey anti-rabbit Alexa-488 secondary  
97 antibody (Jackson ImmunoResearch 711-545-152, 1:400), donkey anti-rabbit Alexa-  
98 594 secondary antibody (Jackson ImmunoResearch 711-585-152, 1:400), and donkey  
99 anti-mouse Alexa-488 secondary antibody (Jackson ImmunoResearch 715-545-150,  
100 1:400).

101

102 **Immunohistochemistry** was performed as described<sup>20</sup>. Briefly, paraffin sections were  
103 deparaffinized by Xylene, 100% EtOH, 95% EtOH, 75% EtOH, 50% EtOH, and PBS  
104 washes. Sections were treated with 10 mM pH6.0 sodium citrate or 10mM pH9.0 Tris-  
105 EDTA solution with microwave at high power for 3 times of 4 minutes, with 5 minutes  
106 intervals. The sections were allowed to naturally cool down to room temperature. Then,  
107 the slides were blocked with TBST 3%BSA solution for 1 hour at room temperature.  
108 After blocking, the samples were incubated with primary antibodies at room  
109 temperature for 2 hrs followed by 5 washes of TBST. After that, the samples were  
110 incubated with fluorescent secondary antibodies overnight at 4 degree. The treated  
111 samples were washed again with TBST 5 times the second day and mounted with  
112 PBS+50% glycerol supplemented with H33342 nuclear dye (Sigma, B2261, 1 µg/ml)  
113 and ready for imaging. To differentiate nuclear staining from MetaBlue  
114 autofluorescence signal, in some of the IHC experiments, PI (Sigma, P4170, 10 µg/ml)  
115 was used as a red nuclear fluorescence dye instead of H33342, which stained the nuclei  
116 with blue fluorescence. IHC experiments without primary antibodies were used as  
117 negative controls. All experiments have been repeated in order to verify the

118 reproducibility of the results.

119

120 **TUNEL assay.** TUNEL assay kits (C1089) were purchased from Beyotime  
121 Biotechnology (Shanghai, China). TUNEL assay was performed as described in the  
122 manufacturer's user manual. Briefly, paraffin sections were deparaffinized by Xylene,  
123 100% EtOH, 95% EtOH, 75% EtOH, 50% EtOH, and H<sub>2</sub>O washes. Then, the sections  
124 were digested with Proteinase K (20 µg/ml) in 10mM TE buffer (pH 7.5) for 15 minutes  
125 at room temperature. After Proteinase K digestion, the slides were washed with PBS  
126 for 5 times. The slides were then incubated in 50 µl freshly-prepared TUNEL labeling  
127 mixture, covered with parafilm and incubated for 1 hour at 37 degree. Afterwards, the  
128 slides were washed with PBS for 5 times and mounted with PBS+50% glycerol solution  
129 with Hoechst nuclear dye and examined under fluorescent microscopes. To perform  
130 double labeling of TUNEL and antibody staining, the incubation time of Proteinase K  
131 treatment was shortened and adjusted to allow the simultaneous detection of protein  
132 antigens and TUNEL signals.

133

134 **Rhodanine staining:** The Rhodanine staining kit (BA4346) was purchased from Baso  
135 Diagnostics Inc. (Zhuhai, China). Briefly, paraffin sections were first deparaffinized by  
136 Xylene, 100% EtOH, 95% EtOH, 75% EtOH, 50% EtOH, and H<sub>2</sub>O washes. After a  
137 quick wash in 95% ethanol, the slides were stained in the Rhodanine staining solution  
138 (0.01% p-Dimethylaminobenzalrhodanine) at 37 degree for 30 minutes. After staining,  
139 the slides were treated with a 95% ethanol quick wash and 5 times wash in water, then  
140 mounted with PBS+50% glycerol solution for imaging analysis.

141

142 **Slide-based A $\beta$  aggregation assay:** Human A $\beta$ 40 or A $\beta$ 42 peptides (Apeptide Co.,  
143 Shanghai, China) were first solubilized with DMSO at 1 mg/mL concentration. Human  
144 hemoglobin (H7379, Sigma) was solubilized in sterile H<sub>2</sub>O at 10 mg/mL concentration.  
145 Then, A $\beta$  peptides were diluted into sterile PBS solution at 5µM concentration with or  
146 without 1.25 µM hemoglobin. The mixture was incubated at 37 degree up to 3 days.  
147 Samples were obtained at Day 0, Day 1, Day 2, and Day 3. 2 µl out of each obtained

148 sample was spotted onto adhesive glass slides and dried up in a 37-degree incubator.  
149 The glass slides with samples were fixed with 4% formaldehyde in PBS for 10 minutes  
150 at room temperature and washed 3 times with PBS. To test the sensitivity of aggregates  
151 to protease digestion, paralleled slides were treated with Proteinase K at 20  $\mu\text{g}/\text{mL}$  in  
152 10mM TE (pH 7.5) buffer for 15 minutes at room temperature. The procedure to  
153 analyze the A $\beta$  aggregates on the slides using antibodies was the same as in  
154 immunohistochemistry.

155

156 **Imaging and morphometry analysis.** Most images were taken with a Leica DM6000B  
157 microscope (Leica Microsystems, Wetzlar, Germany) with A4, L5 and N3 fluorescent  
158 filter cubes. The microscope is equipped with 10X eyepiece, and 5X, 10X, 20X, 40X  
159 objective lens. During the time of manuscript preparation, an Olympus IX71  
160 fluorescent microscope (Olympus Co., Toyoko, Japan) was also used to examine the  
161 slides. Some additional images were taken by a Keyence BZ-X800 microscope  
162 (Keyence Co., Itasca, USA). When comparing marker immunostaining densities,  
163 identical exposure settings for fluorescent channels were used for both control and test  
164 groups. Images were then analyzed with Image J software. Mean area density was used  
165 as the parameter to define the marker densities. The areas of different structures were  
166 also measured with Image J software. The total area intensity was calculated by  
167 multiplying the area mean density with the measured area. When using the average  
168 neural cell as a reference, the values of other anatomical structures divided the mean  
169 value of neural cells to obtain the fold numbers. The folds of changes were then  
170 expressed as means with standard deviations.

171

172 **Statistics.** All data first went through a Shapiro & Wilk normality test using SPSS  
173 Statistics 19 software. Two-tailed unpaired T-test was used to compare the means of  
174 data with a normal distribution with Excel 2007 software. For data that were not  
175 normally distributed, nonparametric Mann/Whitney test was performed to compare the  
176 means with Megastat addin version 10.2. The p Value threshold for statistical  
177 significance is set at 0.05. If  $p < 0.05$ , then the difference was considered statistically

178 significant. When  $p < 0.001$ , it was labeled as  $p < 0.001$ . If  $p \geq 0.001$ , then the p Value was  
179 shown as it was. "\*" in the statistical figures indicated the differences are statistically  
180 significant.

181

## 182 **Results:**

183

### 184 **Neural marker staining rarely overlapped with senile plaque A $\beta$ staining**

185

186 If senile plaque A $\beta$  comes from neural cells, theoretically, senile plaque A $\beta$  expression  
187 should overlap with some neural markers because *in vivo* A $\beta$  does not exist as a single  
188 species molecule but rather associates with many other molecules<sup>21</sup>. We checked the  
189 expression of neuronal marker MAP2, pan-neural marker  $\alpha$ SYN and phos-Tau,  
190 astroglial marker GFAP and microglial marker Iba1 in AD patient frontal lobe brain  
191 tissues. In this study, in order to get a broad image of A $\beta$ -related changes during senile  
192 plaque development, "A $\beta$ " refer to all peptides containing the "A $\beta$ " peptide sequence,  
193 including the precursor protein A $\beta$ PP. We found rare overlaps between senile plaque A $\beta$   
194 with MAP2,  $\alpha$ SYN and phos-Tau (Figure 1A-F) and some spotty overlaps of GFAP or  
195 Iba1 with senile plaque A $\beta$  (Figure 1G-J). Overall, there is no prominent neural marker  
196 overlapping with senile plaque A $\beta$  expression. Especially, in the center of dense-core  
197 senile plaques, there is no expression of any of the neural markers that we have checked.  
198 The data suggested that A $\beta$  from other sources likely form the bulk of A $\beta$  materials in  
199 the senile plaques.

200

201 Although neural marker labeling rarely overlaps with the strong fibrillar A $\beta$  signals in  
202 senile plaques, neural cells do express A $\beta$  related peptides at very low levels. This very  
203 low level of A $\beta$  expression in neural cells can be detected side by side with strong senile  
204 plaque A $\beta$  staining with longer exposure settings (Figure 2). In pathological specimens,  
205 we observed that some senile plaques or CAA blood vessels were surrounded by a few  
206 weakly-stained A $\beta$ -positive neural cells (Figure 2A, C). However, sometimes A $\beta$ -  
207 positive neural cells were not observed in the immediate vicinity of senile plaques or



208 CAA blood vessels (Figure 2B, D). Neural cell A $\beta$  staining was much weaker than in  
209 senile plaques or CAA (Figure 2E). We also observed significant A $\beta$  staining in luminal  
210 patches of blood cells (Figure 2F-H). In order to estimate the relative contribution of  
211 A $\beta$  to senile plaques from different sources, we quantitated the densities of A $\beta$  staining  
212 in different compartments in the AD brain tissues (Figure 2I, J). We analyzed the mean  
213 area A $\beta$  densities of 46 large senile plaques (for simplicity reasons, we only chose a few  
214 large senile plaques per view for this analysis), 9 CAA blood vessels, 9 blood vessel  
215 luminal A $\beta$ -positive regions and 238 neural cells across 34 high power (40X)  
216 microscopic fields in one set of experiments with A $\beta$  staining. The average area in  
217 luminal A $\beta$ -positive blood cell patches, CAA and senile plaques is 44.40 ( $\pm$ 53.63),  
218 19.03 ( $\pm$ 9.20), 4.97 ( $\pm$ 2.68) fold of the area of an average A $\beta$ -positive neural cell (Figure  
219 2I). Comparing to the mean area intensity of A $\beta$  in neural cells, the mean area intensity  
220 of luminal A $\beta$ -positive blood cell patches, CAA and senile plaques is around 1.85  
221 ( $\pm$ 0.59), 5.59 ( $\pm$ 0.74), 5.06 ( $\pm$ 0.93) fold of an average neural cell (Figure 2J). The mean  
222 area A $\beta$  intensity of CAA was not statistically different from the mean area A $\beta$  intensity  
223 of senile plaques ( $p=0.08$ ), while the difference between A $\beta$  intensities of luminal A $\beta$ -  
224 positive blood cell patches and average neural cells was statistically significant  
225 ( $p<0.001$ ). By multiplying the average area and mean area intensity numbers, the total  
226 area intensity of A $\beta$  in an average senile plaque is roughly 25.14 times of the total area  
227 A $\beta$  intensity of an average neural cell. Take this estimation to the three-dimensional  
228 level, an average senile plaque approximately contains the same amount of A $\beta$  in as  
229 many as 126.03 average neural cells (estimated by multiplying the total area intensity  
230 fold number with the square root of the total area intensity fold number). In another  
231 word, an average A $\beta$ -positive neural cell only has about 0.79% of the A $\beta$  content in an  
232 average senile plaque. Based on counting results from 34 high power fields, each  
233 microscopic field contained by average 2.62 ( $\pm$ 1.99) large senile plaques while 46.94  
234 ( $\pm$ 9.53) A $\beta$ -positive neural cells. When comparing to an average senile plaque, the mean  
235 area A $\beta$  intensities of luminal patches and CAA are 0.37 ( $\pm$ 0.12) and 1.10 ( $\pm$ 0.15) fold  
236 of an average senile plaque. The average areas of luminal patches and CAA are 8.94  
237 ( $\pm$ 10.8) and 3.83 ( $\pm$ 1.85) fold of an average senile plaque. At the three-dimensional



238 level, an average CAA blood vessel contains the same amount of A $\beta$  as in roughly 8.65  
239 average senile plaques while an average luminal A $\beta$ -positive region contains the same  
240 amount of A $\beta$  as in roughly 6.02 average senile plaques. The experiment was repeated  
241 on different samples and with different fluorophores and the results showed similarly  
242 the extremely low A $\beta$  expression in neural cells comparing to senile plaques. This  
243 quantitative analysis pointed out that the very low level A $\beta$  in neural cells and the  
244 limited number of neural cells might not provide sufficient amount of A $\beta$  for the senile  
245 plaque formation while A $\beta$ -positive blood cells and CAA blood vessels contained  
246 sufficient amount of A $\beta$ , which could be the source of A $\beta$  in senile plaques.

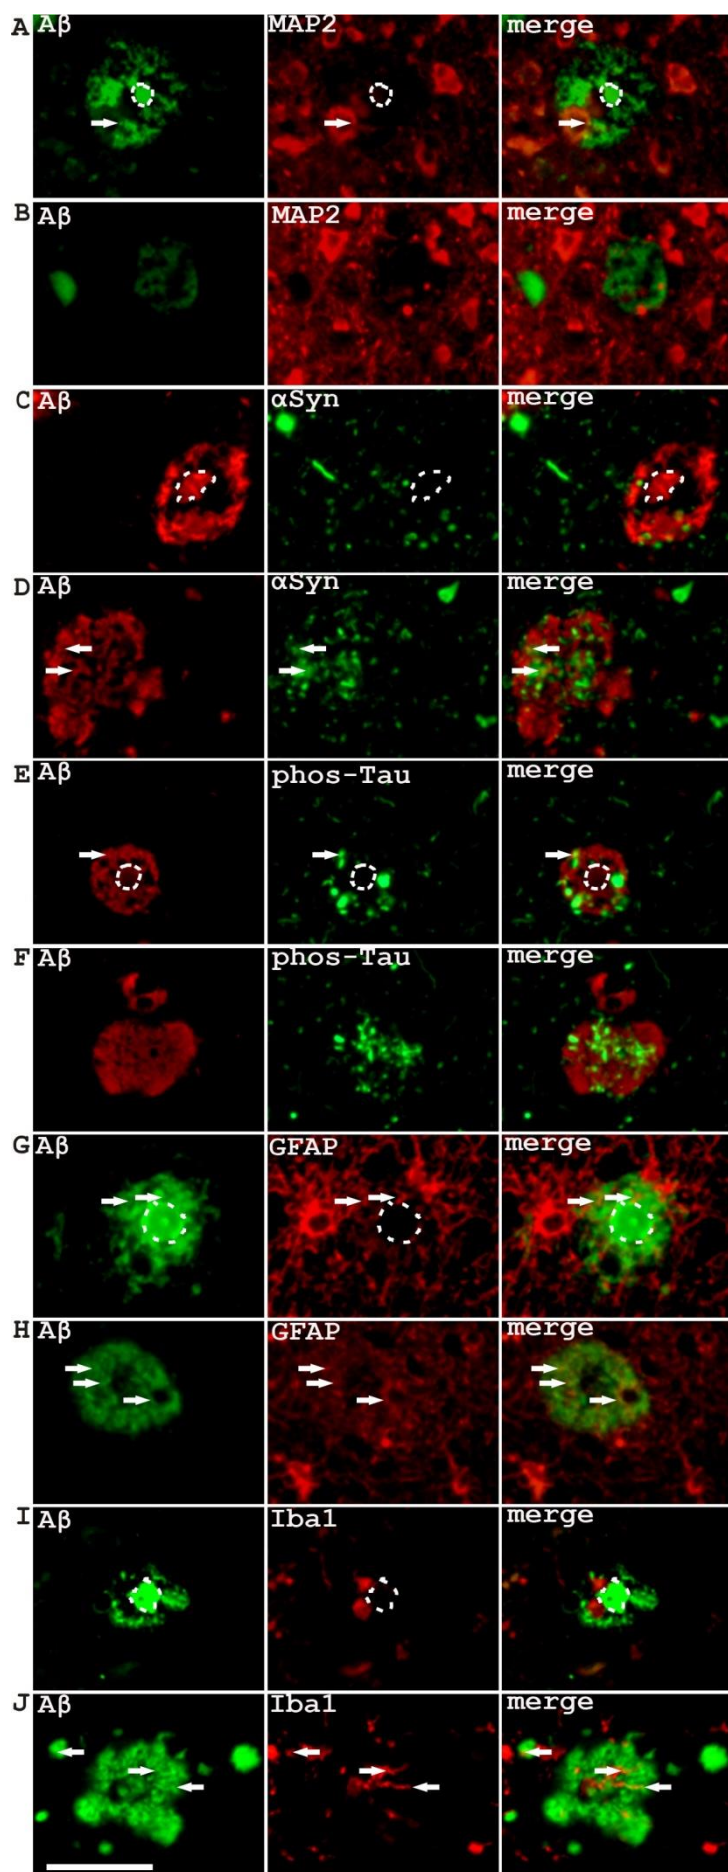

248 **Figure 1. Co-immunostaining of neuronal marker MAP2, pan-neural markers**  
249  **$\alpha$ SYN and phos-Tau or glial cell markers GFAP and Iba1 with A $\beta$  in dense-core**  
250 **(top panel for each marker) or diffusive senile plaques (bottom panel for each**  
251 **marker). (A-B), MAP2; (C-D),  $\alpha$ SYN; (E-F), phos-Tau; (G-H), GFAP; (I-J), Iba1.**  
252 Arrows pointed to possible overlapping of the markers. The circled areas indicated the  
253 core of dense-core plaques, which were not stained with any of the neural markers  
254 examined. Scale bar, 50  $\mu$ m.  
255

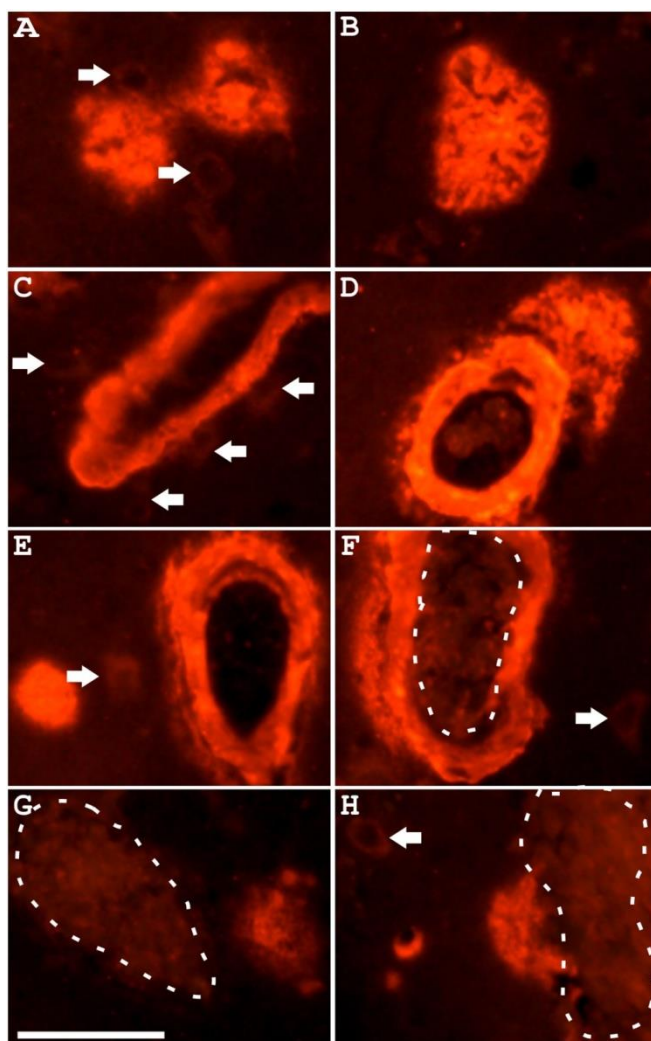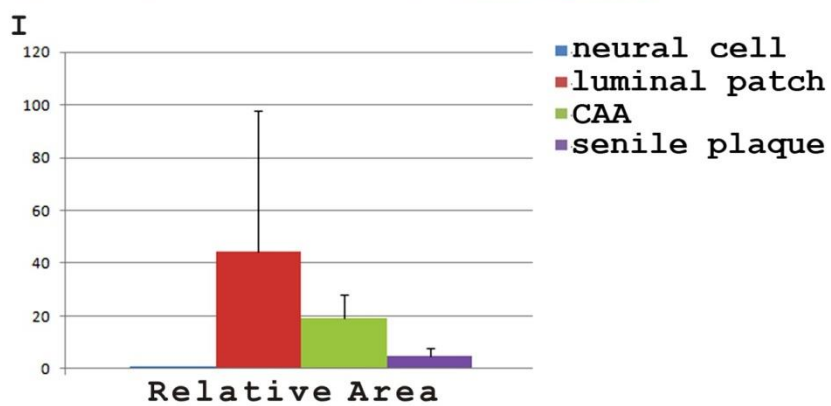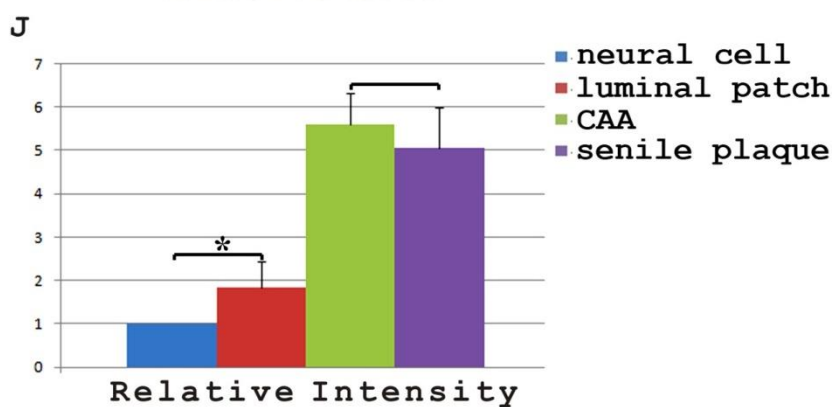

257 **Figure 2. A $\beta$  staining in neural cells, senile plaques, CAA, and luminal patch of**  
258 **A $\beta$ -positive blood cells. (A, B) Senile plaques with or without weakly A $\beta$ -positive**  
259 **neural cells at the vicinity. (C, D) CAA with or without weakly A $\beta$ -positive neural cells**  
260 **at the vicinity. E. Neural cell A $\beta$  (indicated with an arrow) staining was much weaker**  
261 **comparing to plaque (left) or CAA (right) A $\beta$  staining. F. CAA and luminal blood cell**  
262 **A $\beta$  staining was stronger than neural cell A $\beta$  staining (indicated with an arrow). G.**  
263 **Blood cell A $\beta$  staining (on the left) intensity was weaker comparing to a developing**  
264 **senile plaque (on the right). H. Perivascular plaque and blood cell A $\beta$  staining (dashed**  
265 **lines) was stronger than neural cell A $\beta$  staining (indicated with an arrow). The arrows**  
266 **indicated the weakly stained neural cells. The dashed lines indicate luminal blood cells.**  
267 **Scale bar, 50  $\mu$ m. I. The average area in luminal A $\beta$ -positive blood cell patches, CAA**  
268 **and senile plaques is 44.40 $\pm$ 53.63, 19.03 $\pm$ 9.20, 4.97 $\pm$ 2.68 fold of the area of an average**  
269 **neural cell. J. The mean area intensity of luminal A $\beta$ -positive blood cell patches, CAA**  
270 **and senile plaques is around 1.85 $\pm$ 0.59, 5.59 $\pm$ 0.74, 5.06 $\pm$ 0.93 fold of an average neural**  
271 **cell. A $\beta$  intensities of luminal A $\beta$ -positive blood cell patches were significantly higher**  
272 **than average neural cells ( $p < 0.001$ ) while no significant difference was detected**  
273 **between CAA and senile plaque A $\beta$  intensities ( $p = 0.08$ ). The asterisk indicated**  
274 **statistical significance.**

275

### 276 **Senile plaque A $\beta$ staining seldom colocalized with nuclear stains**

277

278 Because A $\beta$  often showed extracellular localizations, people assumed that A $\beta$  might be  
279 derived from dead neurons. However, the direct evidence that linked senile plaque A $\beta$   
280 with dying neurons is lacking. In our analysis, most A $\beta$  plaques did not have nuclei  
281 associations, agreeing with their predominantly extracellular localizations (Figure 3A).  
282 In addition, A $\beta$  plaques did not colocalized with TUNEL-labeled nuclei, disagreeing  
283 with the assumption that A $\beta$  might come from dying neurons (Figure 3B). Surprisingly,  
284 we observed a faint blue fluorescent staining in the centers of many dense-core plaques,  
285 which showed amorphous irregular patterns distinct from densely-stained oval shape  
286 nucleus staining (Figure 3A, bottom). To differentiate blue autofluorescence from blue

287 nuclei staining, we switched to use a red fluorescence nuclei dye Propidium Iodide (PI).  
288 We proved that the amorphous blue fluorescent staining in the center of dense-core  
289 senile plaques is a blue autofluorescence, but not nuclei staining (Figure 3C). This blue  
290 autofluorescence was a robust and consistent marker of senile plaques, which  
291 associated with senile plaques of different morphologies and sizes including dense-core  
292 senile plaques, large diffusive senile plaques and small diffusive senile plaques (with  
293 more pictures shown in Supplementary Figure 1). We think the blue autofluorescent  
294 material could be a constitutive component of senile plaques that associates with A $\beta$   
295 during the full course of senile plaque formation process. At the time of preparing this  
296 manuscript, we noticed that several earlier studies already recognized senile plaques  
297 had characteristic autofluorescence although the true source of this blue  
298 autofluorescence is unknown<sup>22,23</sup>. To facilitate the study and discussion on this unique  
299 and potentially important substance, we would like to give a temporary special name  
300 for this material as "MetaBlue" in this manuscript (meaning for a blue metabolite or a  
301 mixture of blue metabolites) until the accurate identity of this material is fully revealed.  
302

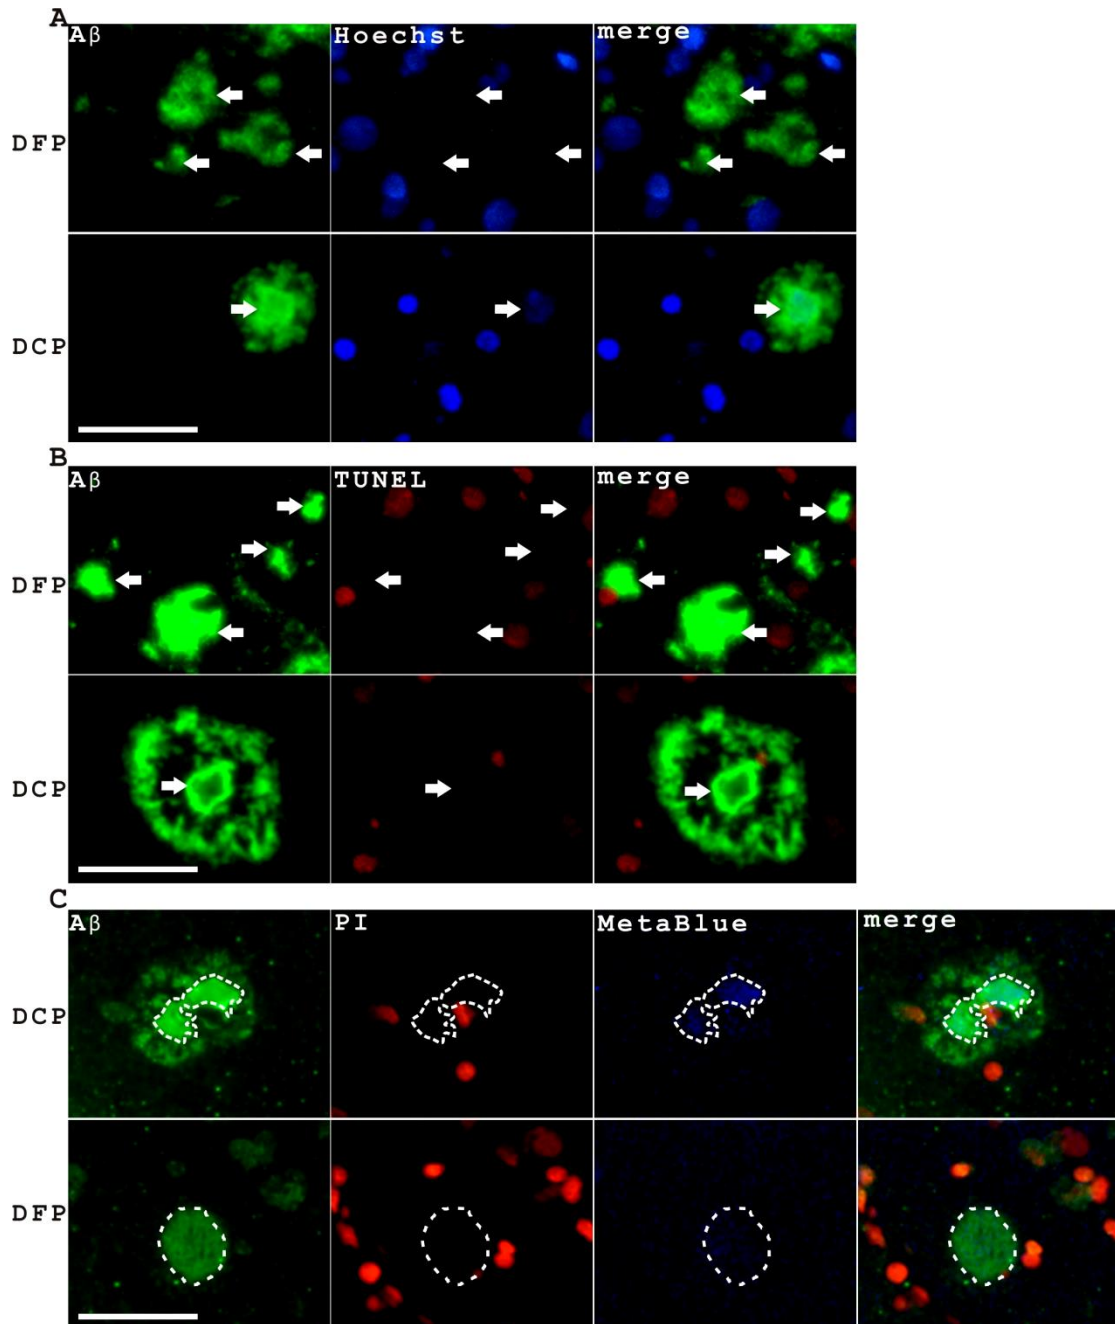

303  
304

305 **Figure 3. Senile plaques seldom associated with nuclei DNA staining. A.** Senile  
306 plaques were seldom stained with Hoechst. Diffusive plaques (DFP) or stella plaques  
307 were mostly not stained with Hoechst. Irregular amorphous blue fluorescent signals  
308 were observed in the cores of dense-core plaques (DCP) but distinct from nuclear  
309 staining. Arrows point to senile plaques. **B.** Diffusive plaques (DFP) or dense-core  
310 plaques (DCP) were not associated with TUNEL-labeled nuclei. Arrows point to senile  
311 plaques. **C.** Dense-core plaques (DCP) had a relatively strong blue autofluorescence  
312 while the blue autofluorescence signal in diffusive plaques (DFP) was weak. The



313 dashed lines indicated dense-core or diffusive senile plaques with blue autofluorescence  
314 but without PI-positive nuclei. Scale bar, 50  $\mu$ m.

315

316 **Senile plaque A $\beta$  staining overlapped with MetaBlue, a specific blue**  
317 **autofluorescence, that was also prominently found in red blood cells**

318

319 To trace the origin of MetaBlue, we combined immunohistochemistry staining with  
320 autofluorescence imaging. We found that MetaBlue was prominently associated with  
321 A $\beta$  (Figure 4A) and HBA (Figure 4B) in CAA blood vessel wall, senile plaques and  
322 red blood cells. The intensity of MetaBlue in the center of A $\beta$ -marked dense-core  
323 plaques is comparable to the MetaBlue intensity in CAA blood vessels and often higher  
324 than in diffusive senile plaques, which suggested that MetaBlue is either degraded or  
325 dispersed in diffusive plaques or the diffusive plaques have less MetaBlue materials  
326 starting with. MetaBlue signals were clearly observed in red blood cells identified with  
327 HBA or Glycophorin A staining (Figure 4C). With the senile plaque association of  
328 predominantly blood origin MetaBlue and HBA but much less with neural markers such  
329 as MAP2,  $\alpha$ SYN, phos-TAU, GFAP and Iba1, it suggested that senile plaque A $\beta$  might  
330 directly come from the blood instead of neural cells.

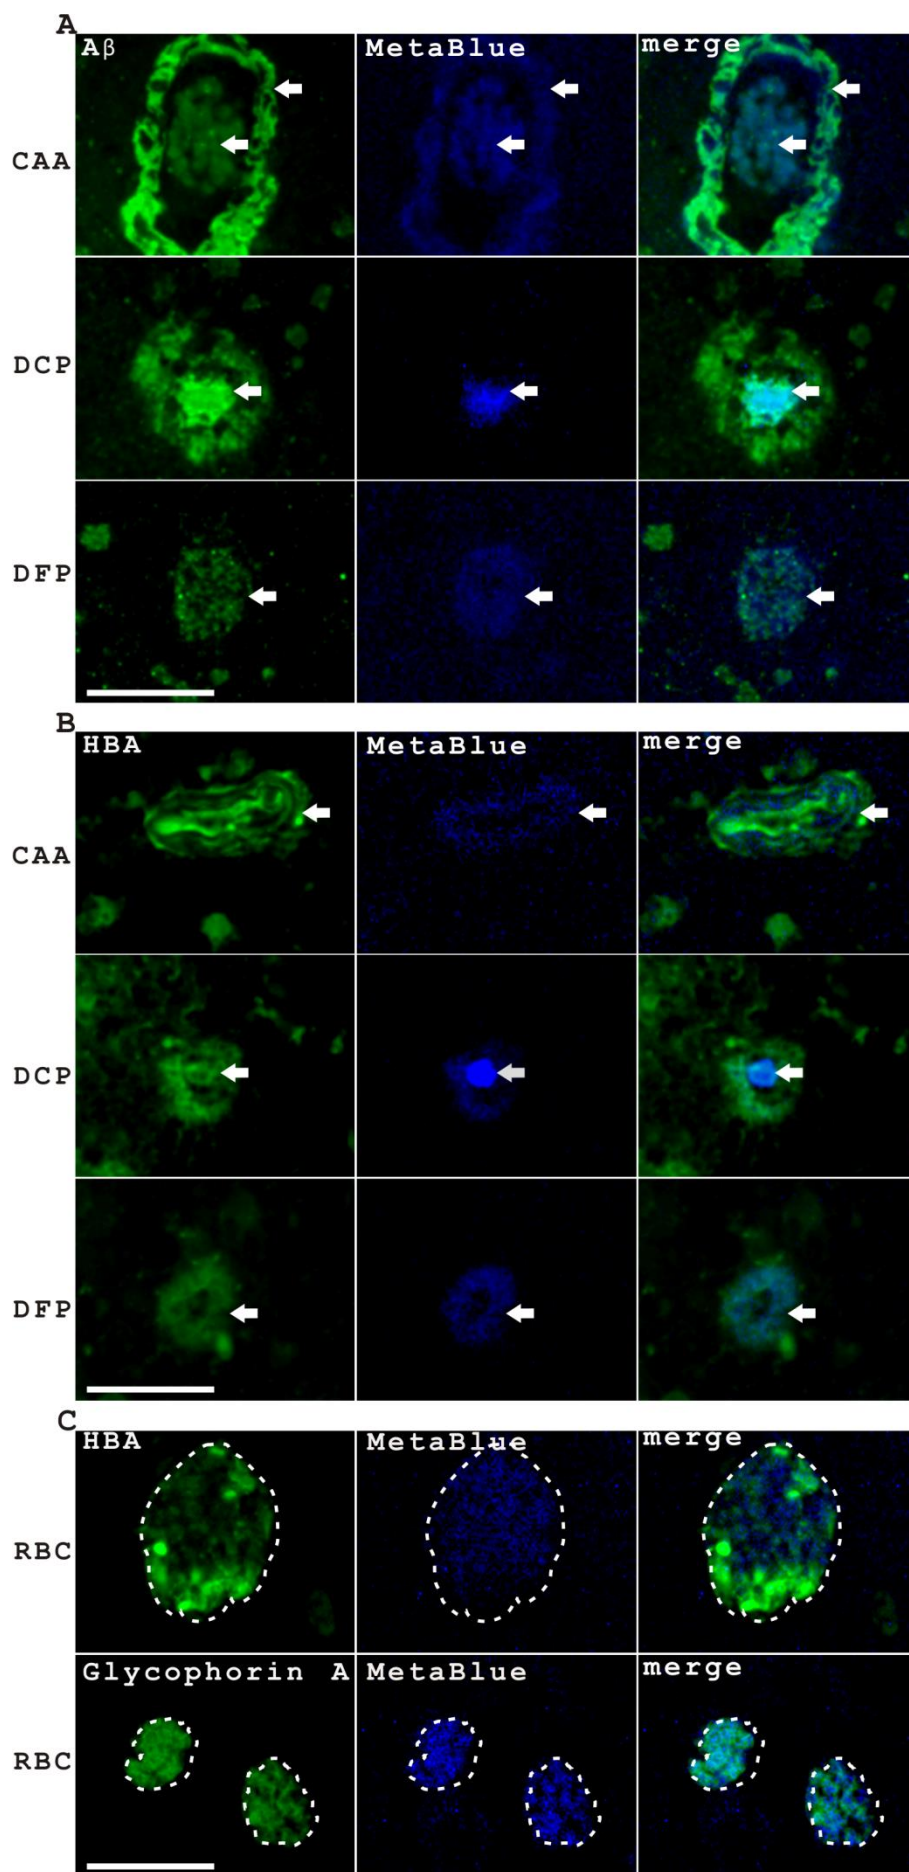

332 **Figure 4. The MetaBlue blue autofluorescence signals overlapped with A $\beta$  and**  
333 **alpha hemoglobin (HBA) staining in CAA, dense-core plaques and diffusive**  
334 **plaques and were also present in the red blood cells. A.** MetaBlue signals co-stained  
335 with A $\beta$  in CAA, dense-core plaques (DCP) and diffusive plaques (DFP). **B.** MetaBlue  
336 signals co-stained with HBA staining in CAA, dense-core plaques, and diffusive  
337 plaques. **C.** MetaBlue signals were clearly observed in red blood cells (RBC) labeled  
338 either with HBA or with Glycophorin A. The arrows pointed to the co-expression of  
339 markers. Dashed lines indicated red blood cell clusters with overlapping MetaBlue  
340 staining. Scale bar, 50  $\mu$ m.

341

#### 342 **The association of blood markers HBA, HbA1c, ApoE, CD42b with senile plaques**

343

344 To directly check the association of A $\beta$  with blood markers, we did co-staining of A $\beta$   
345 with red blood cell marker HBA and HbA1C (shown in Figure 5), blood plasma marker  
346 ApoE and platelet marker CD42b (shown in Figure 6). A $\beta$  staining was observed to  
347 associate with HBA staining in CAA, in dense-core plaques and in diffusive plaques  
348 (Figure 5A). However, not all senile plaques showed the same intensity HBA staining.  
349 In some diffusive plaques, HBA immunostaining signals were very weak (Figure 5A,  
350 bottom). The heterogeneity of HBA signals in senile plaques likely reflected the  
351 heterogeneous and dynamic nature of senile plaque formation, which was repeatedly  
352 observed in our experiments with multiple markers. More pictures showed the red blood  
353 cell A $\beta$  staining was provided in Supplementary Figure 2. Since HbA1C is a glycation  
354 product of hemoglobin, which is also related to diabetes and aging changes of red blood  
355 cells<sup>24</sup>, we decided to check the expression of HbA1C in senile plaques. The experiment  
356 results indicated that HbA1C staining also associated with A $\beta$  staining in CAA, in  
357 dense-core plaques and in diffusive plaques (Figure 5B).

358

359 Since ApoE is a plasma protein that associates with A $\beta$ , which is an important modifier  
360 of AD risk<sup>25</sup>, it is important to examine the interactions between A $\beta$  and ApoE during  
361 senile plaque development. We observed that A $\beta$  staining associated with ApoE in small

362 or large patches in the blood vessel lumens, and also in CAA and perivascular plaques,  
363 in dense-core senile plaques and in diffusive senile plaques (Figure 6A). The frequent  
364 presence of ApoE in blood vessel lumen suggested that ApoE is mostly derived from  
365 the blood (Figure 6A, second and third panels). In addition, ApoE intensity was highly  
366 variable in senile plaques while senile plaque A $\beta$  intensity is relatively stable, which  
367 again suggested the dynamic nature of senile plaques (Figure 6A, bottom two panels).  
368 ApoE associated with senile plaques of different morphologies such as dense-core or  
369 diffusive senile plaques and with different sizes regardless they were large or small,  
370 with more pictures shown in Supplementary Figure 3. We think that ApoE could be an  
371 additional constitutive component of senile plaques besides A $\beta$  and MetaBlue.

372

373 Platelets are another important type of cells in the blood that frequently link to blood  
374 abnormalities in many diseases. Platelets was previously thought to be related to senile  
375 plaque formation and be an important source of A $\beta$ PP<sup>26</sup>. We used CD42b as a marker  
376 of platelets to analyze the behavior of platelets during senile plaque formation. We  
377 found that A $\beta$ -positive and CD42b-positive platelets attached to blood vessel walls,  
378 indicating the presence of blood vessel damage as it is well-known that blood vessel  
379 wall damage activates platelets and attracts platelets to the damage sites (Figure 6B,  
380 top). Large aggregations of CD42b-positive platelets with clearly detectable A $\beta$   
381 expression were also found in the blood vessels, suggesting the happening of  
382 intravascular coagulation (Figure 6B, middle). Additionally, CD42b-positive platelets  
383 were found in dense-core senile plaques (Figure 6B, bottom). However, the staining  
384 intensity of A $\beta$  on platelets was in general lower comparing to what we observed in A $\beta$ -  
385 positive red blood cells in AD brain tissues. With complicated regulations between  
386 platelets and red blood cells<sup>27-30</sup>, platelet could be another significant player involving  
387 blood leakage and senile plaque formation.

388

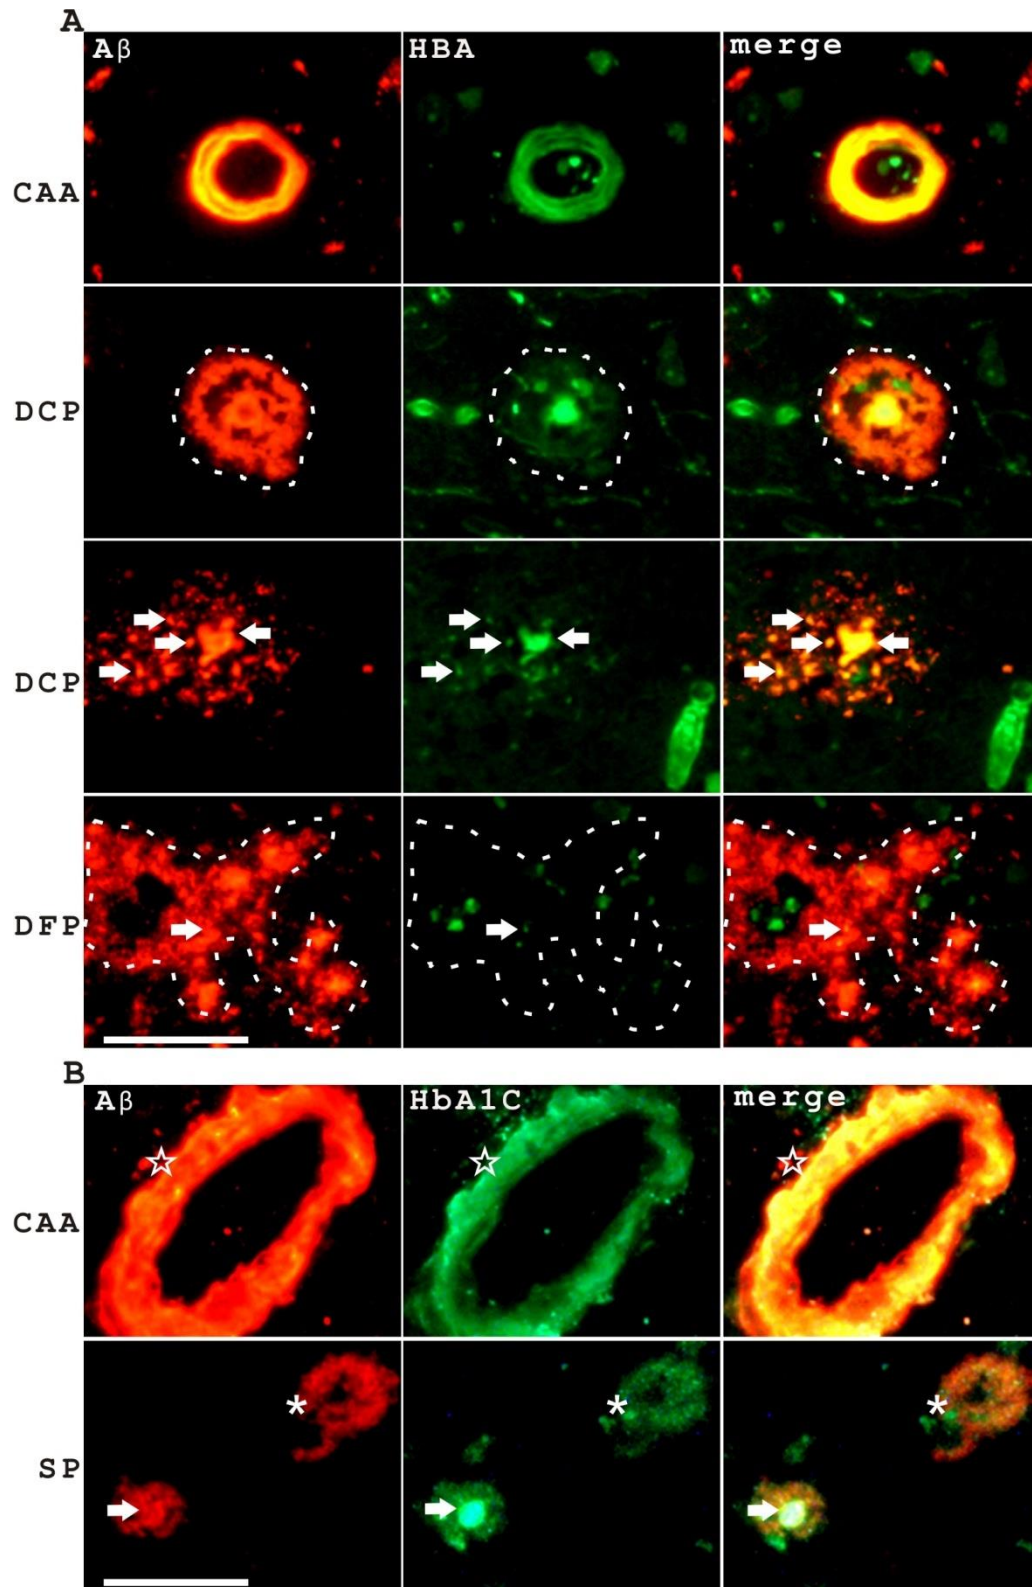

389

390 **Figure 5. Hemoglobin colocalized with Aβ during different stages of senile plaque**  
391 **development. A.** Red cell markers HBA co-expressed with Aβ at different stages of  
392 senile plaque development, in CAA, dense-core plaques and diffusive plaques.  
393 However, not all senile plaques display strong HBA staining. Some large diffusive

394 plaques with very weak HBA staining were also observed (bottom). The dashed lines  
395 indicated dense-core senile plaques or diffusive plaques. The arrows indicated some  
396 diffusive A $\beta$  aggregates. **B.** Red cell marker HbA1C (glycated hemoglobin) also co-  
397 expressed with A $\beta$  in CAA (indicated with pentagons) and dense-core plaques  
398 (indicated with arrows) and diffusive plaques (indicated with asterisks). Scale bars, 50  
399  $\mu$ m.  
400  
401



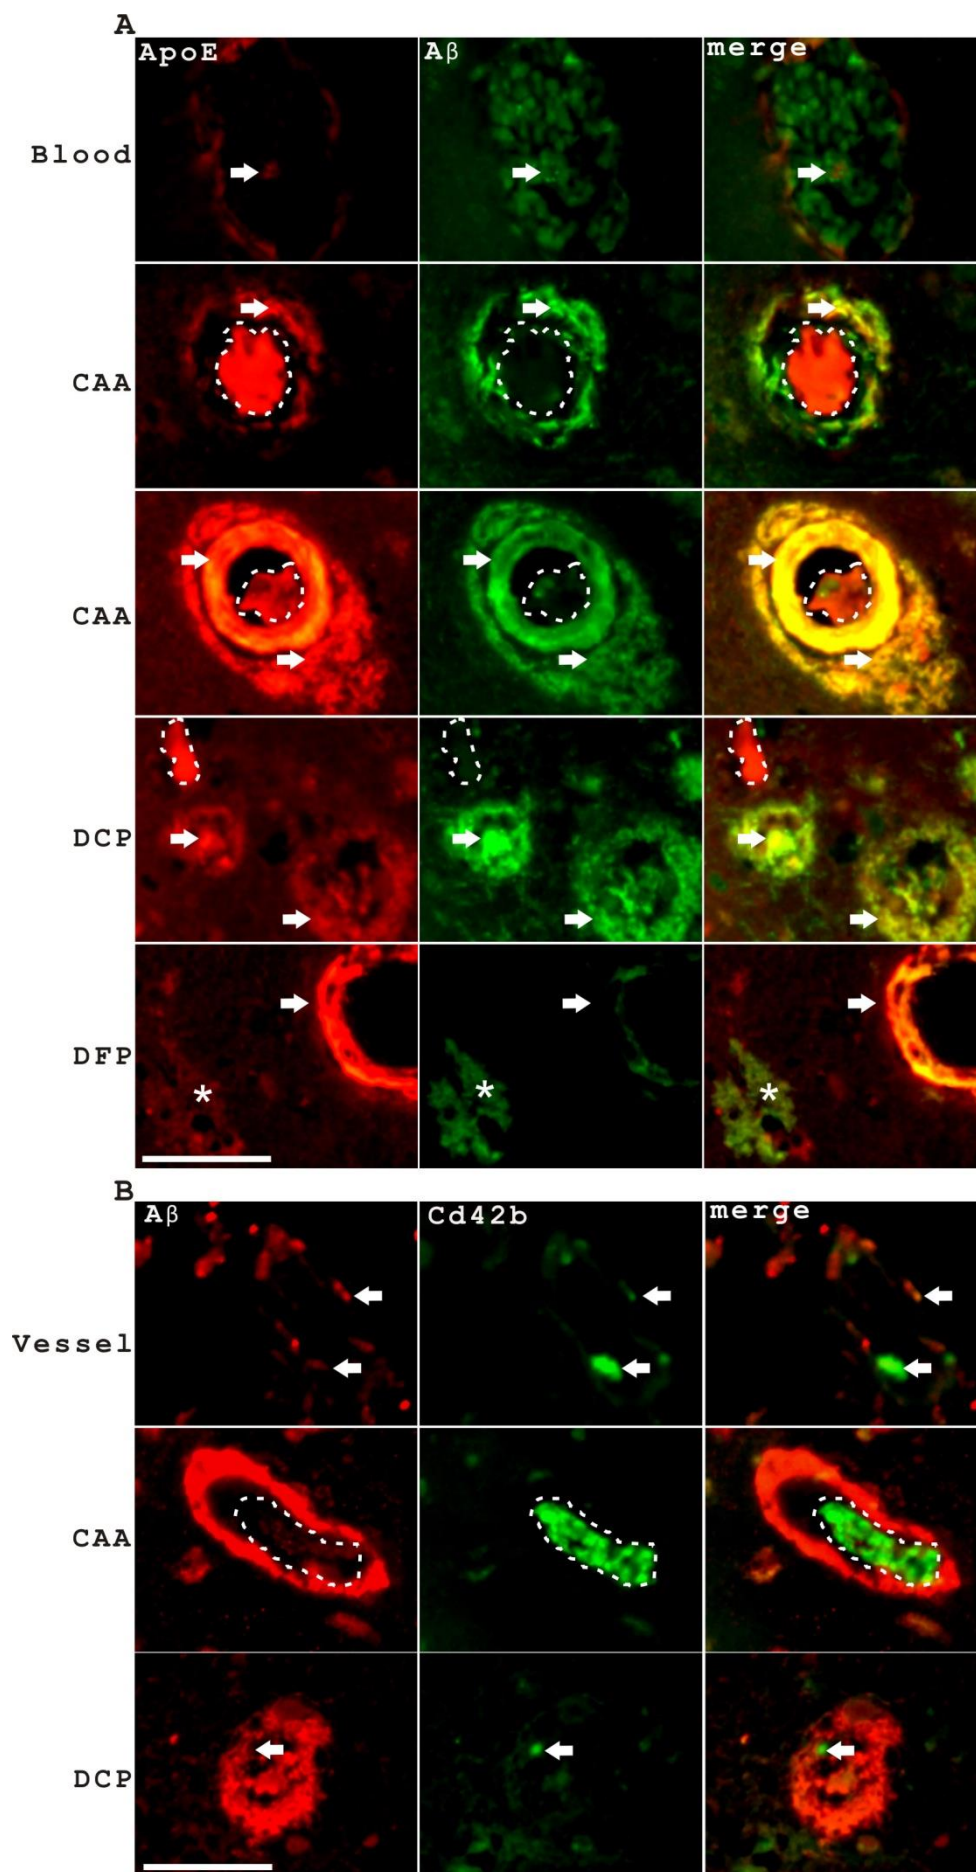



403 **Figure 6. The association of blood marker ApoE and platelet marker CD42b with**  
404 **senile plaque development. A.** ApoE associated with A $\beta$  in small blood cell patches in  
405 the vessel (top), in large patches in the vessel and in perivascular plaques (second panel),  
406 in CAA (third panel), in dense-core senile plaques (fourth panel) and in diffuse  
407 plaques (bottom). Arrows indicated the co-expression of markers in CAA and senile  
408 plaques. Dashed lines indicated the staining in luminal blood patches. The asterisk  
409 indicated a diffuse senile plaque with ApoE staining much weaker than neighboring  
410 CAA. **B.** CD42b-labeled platelets participated senile plaque development. Platelets  
411 with A $\beta$  expression were observed in platelets adhering to vascular wall (top) or in  
412 platelet aggregations in the blood vessel (middle). Platelets were also observed directly  
413 in senile plaques (bottom). The arrows indicated the platelets. The dashed lines  
414 indicated a patch of aggregated platelets. Scale bars, 50  $\mu$ m.

415

416 **The dynamic interaction of A $\beta$  expression and vascular degeneration during senile**  
417 **plaque development examined with ColIV, ACTA2 and LRP1 staining**

418

419 CAA, vascular degeneration and microhemorrhage have been long implicated to be  
420 involved in the senile plaque formation<sup>9,10,12,17,18</sup>. However, the exact contribution of  
421 blood vessels to senile plaques is not so clear. We used ColIV as a blood vessel marker  
422 to examine the blood vessel changes during the senile plaque formation process (Figure  
423 7). As it is well-known, ColIV labels the extracellular matrix collagen component of  
424 the blood vessels. Firstly, we observed patches of strong A $\beta$  staining with diffuse  
425 luminal ColIV staining in the blood vessels, an indication of blood vessel damage  
426 (Figure 7, top). We also observed A $\beta$  staining associates with ColIV staining in vessel  
427 walls in CAA (Figure 7, second panel). In CAA blood vessels, some overlapping of A $\beta$   
428 and ColIV staining was observed, suggesting A $\beta$  probably was accumulated in the  
429 vessel extracellular matrix. In addition, we observed strong perivascular A $\beta$  staining  
430 with concurrent diffuse ColIV staining, again indicating blood vessel damage (Figure  
431 7, third panel). Moreover, balloon-shape bulge formation in large blood vessels was  
432 also detected (Figure 7, fourth panel). These bulges contained condensed staining of A $\beta$

433 that was surrounded by degenerative ColIV staining, indicating that blood vessel  
434 aneurysm could be formed, which might be a way to induce dense-core senile plaques.  
435 This observation is consistent with a previous study stating lumpy and bumpy blood  
436 vessels were found in AD brain tissues by using scanning electron microscopy<sup>31</sup>. The  
437 tight association between senile plaque formation and vascular degeneration was  
438 observed in both dense-core senile plaques (Figure 7, fifth to seventh panel) and  
439 diffusive senile plaques (Figure 7, bottom). Our observation suggested that the senile  
440 plaque formation is intrinsically linked with vascular degeneration and  
441 microhemorrhage with blood-borne A $\beta$  leakage.

442

443

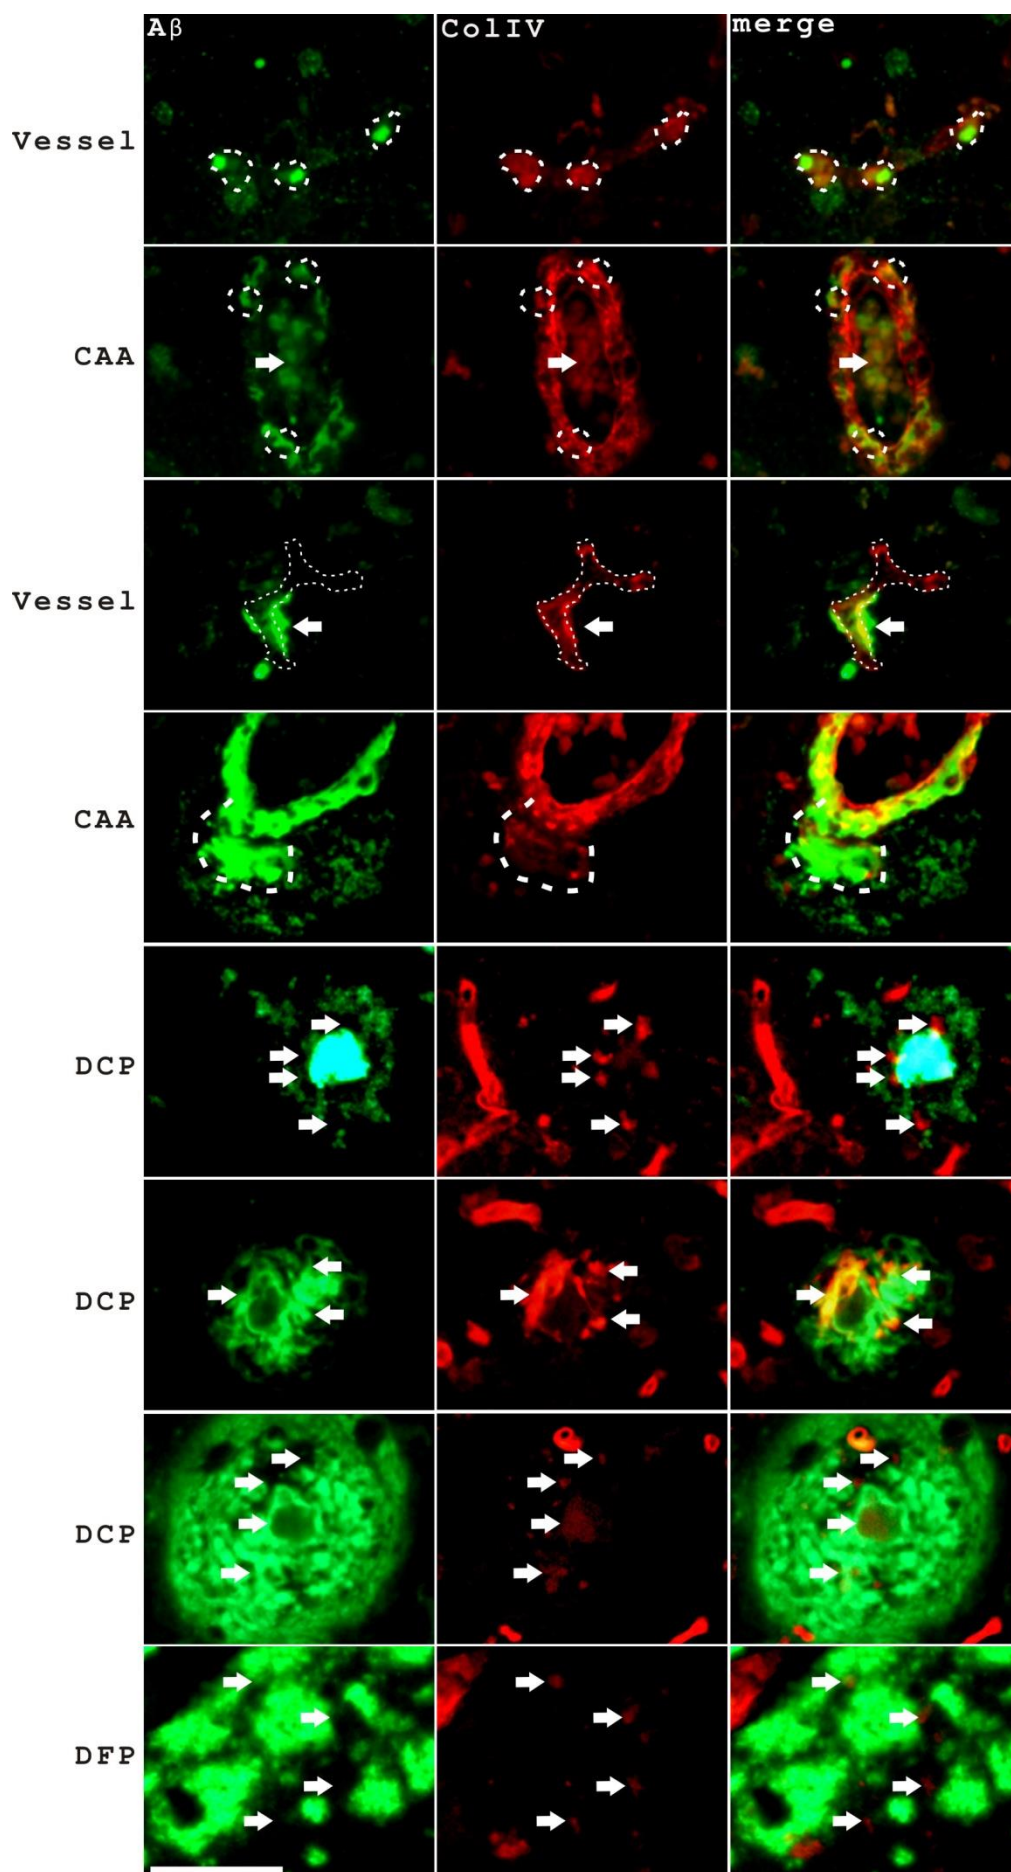

445 **Figure 7. The dynamic interaction of A $\beta$  expression and blood vessel alterations in**  
446 **senile plaque development.** Discrete condensed A $\beta$  staining was observed in a blood  
447 vessel accompanying diffusive ColIV staining in the vessel lumen (indicated by dashed  
448 lines in the top panel). A $\beta$  staining associated with CAA blood vessel wall (indicated  
449 by dashed circles) and also blood cells (indicated with arrows in the second panel). A $\beta$   
450 perivascular staining (indicated with arrows in the third panel) was associated with a  
451 "dissolving" blood vessel phenotype (indicated with dashed lines) with diffusive ColIV  
452 staining in the vessel lumen. A bulge-like structure (indicated with dashed lines in the  
453 fourth panel) was observed in a large blood vessel containing concentrated A $\beta$ ,  
454 suggesting blood vessel aneurysm might be happening. Three examples of dense-core  
455 senile plaques showed degenerated blood vessel remnants (indicated with arrows in the  
456 fifth, sixth, seventh panels) scattering around senile plaque structures. An example of a  
457 diffusive senile plaque intermingled with degenerated vessel remnants (indicated with  
458 arrows in the bottom panel) was also shown. Scale bar, 50  $\mu$ m.

459

460 To further illustrate the relationship of vascular defects with senile plaque formation,  
461 we also analyzed two other blood vessel related markers ACTA2 and LRP1. ACTA2  
462 labels the smooth muscle cells of the blood vessels. LRP1 is an ApoE receptor involving  
463 A $\beta$  clearance that expresses strongly in the endothelium of blood vessels<sup>32,33</sup>. Our  
464 experiment showed that in early stages of CAA development, ACTA2 staining regions  
465 were mostly complementary to A $\beta$  staining regions in the blood vessels, suggesting that  
466 the initial A $\beta$  in the CAA blood vessel probably resided in the blood vessel extracellular  
467 space (Figure 8A, top). This is consistent with the observations of some overlapped  
468 staining between A $\beta$  and ColIV, which is a marker of blood vessel extracellular matrix.  
469 These observations hinted that CAA is probably formed by blood leakage through the  
470 endothelial cell barrier into blood vessel extracellular matrix. We also observed  
471 diffusive staining of ACTA2 in CAA blood vessel lumen and some large diffusive  
472 patches of ACTA2 staining in the AD brain tissues (Figure 8A, second and third panels),  
473 both of which indicated blood vessel degeneration, similarly as it was shown by  
474 diffusive ColIV staining. Additionally, degenerated blood vessel remnants marked with

475 ACTA2 were also observed in the center of senile plaques (Figure 8A, bottom), further  
476 confirming the direct relation between senile plaque formation and vascular  
477 degeneration.

478

479 LRP1 was observed to label the blood vessels with diffusive luminal staining of A $\beta$   
480 (Figure 8B, top). LRP1 also clearly labeled blood vessel structures surrounding the  
481 center of dense-core senile plaques (Figure 8B, middle and bottom). We also observed  
482 that condensed A $\beta$  came out of blood vessels precisely on site through openings on the  
483 vessel wall (indicated with arrows in Figure 8B, middle and bottom panels). Small  
484 vessel degeneration with A $\beta$  in the lumen might be another way to produce dense-core  
485 plaques besides blood vessel aneurysm.

486

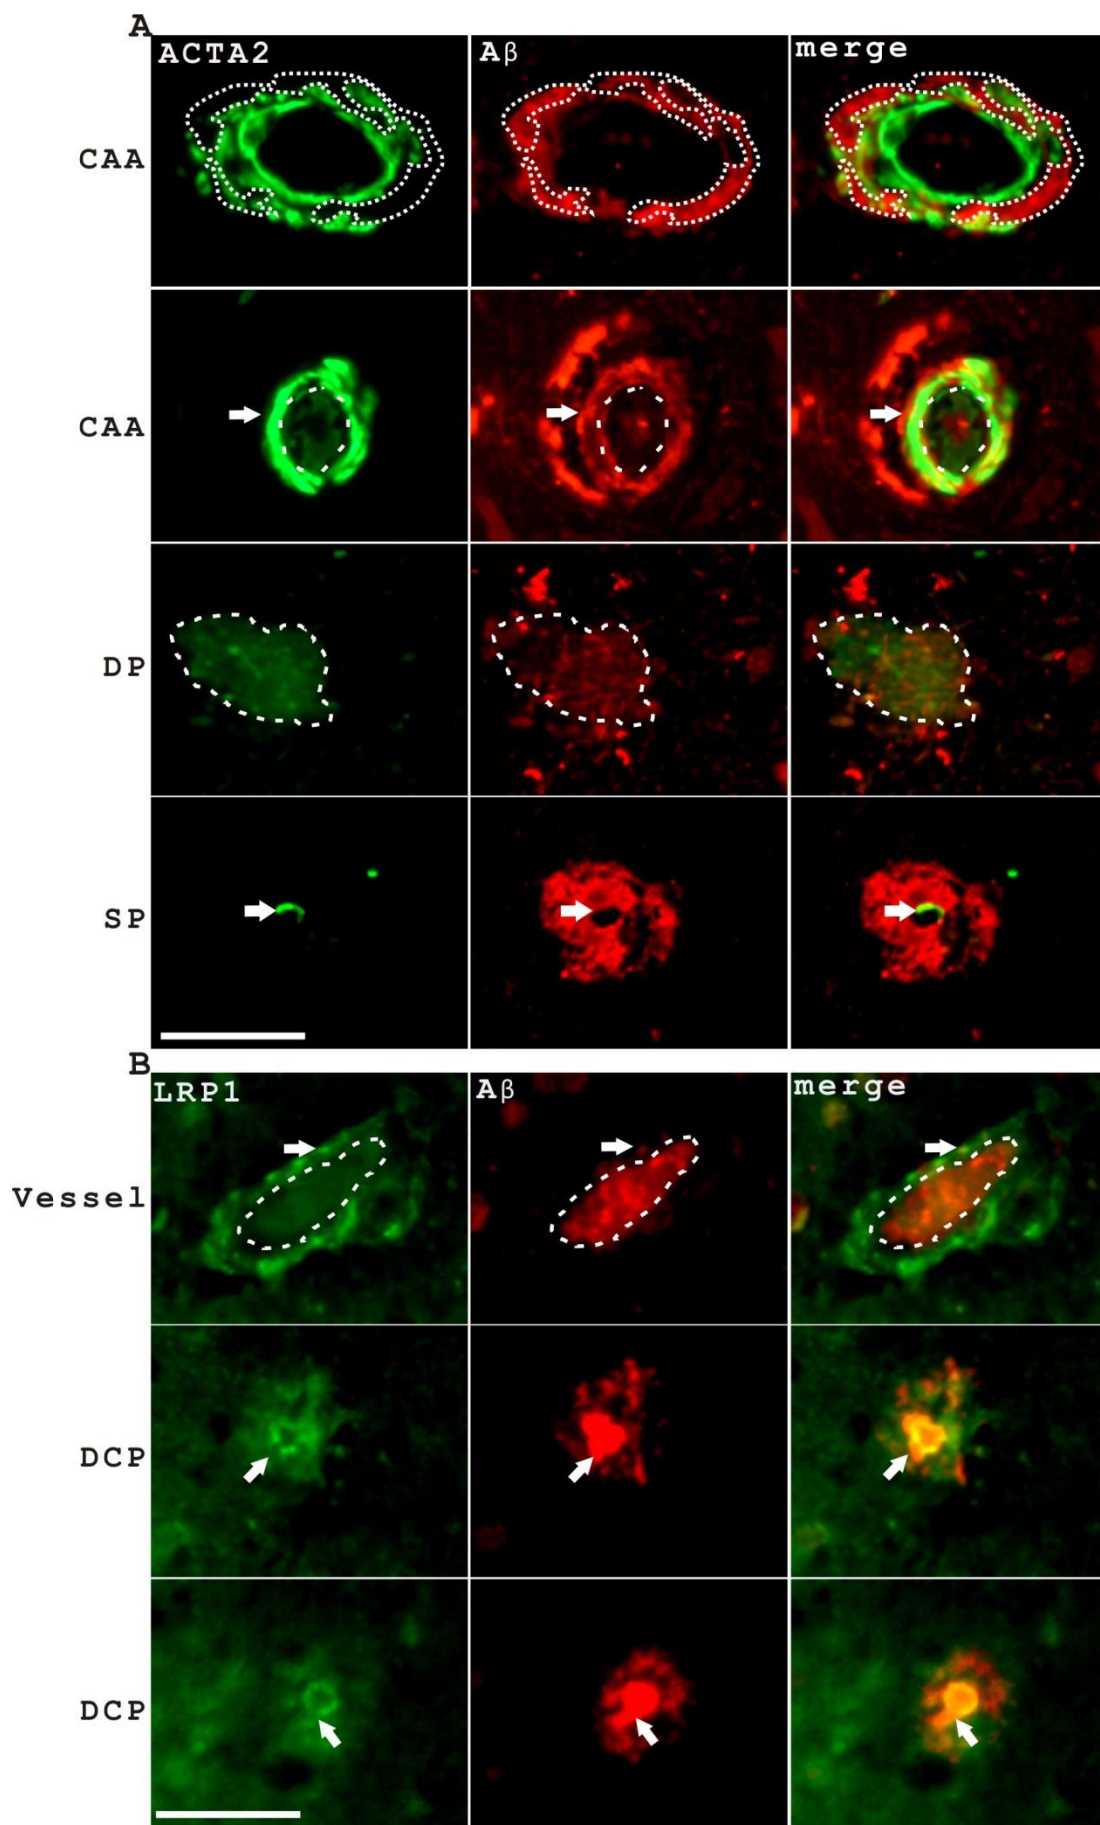



488 **Figure 8. The dynamic interaction of A $\beta$  expression and blood vessel marker**  
489 **ACTA2 and LRP1 in senile plaque development. A.** The dynamic interaction of A $\beta$   
490 expression and blood vessel marker ACTA2 in senile plaque development. CAA A $\beta$   
491 staining mostly showed a complementary expression pattern relative to ACTA2, a  
492 smooth muscle cell marker (indicated with dashed lines in the top panel). ACTA2  
493 staining was also observed in the vessel lumen (indicated with dashed lines in the  
494 second panel) of a CAA blood vessel (indicated with an arrow). A diffusive patch (DP)  
495 of ACTA2 staining, an indication of blood vessel degeneration, was observed to  
496 associate with diffusive, fibrillar A $\beta$  staining (indicated with dashed lines in the third  
497 panel). Degenerated blood vessel remnants with ACTA2 staining were also observed in  
498 the center of a senile plaque (indicated with arrows in the bottom panel). **B.** The  
499 dynamic interaction of A $\beta$  expression and blood vessel marker LRP1 in senile plaque  
500 development. LRP1 expression was observed in the blood vessel wall, also in the blood  
501 vessel structures in the dense-core senile plaques (DCP). The arrows indicated the co-  
502 expression of markers. Scale bar, 50  $\mu$ m.

503

504 **Blood vessel A $\beta$  expression associates with red blood cell damage and vascular**  
505 **damage**

506

507 After repeated experiments of A $\beta$  staining in the blood cells and in the blood vessels, it  
508 came clear to us that A $\beta$  does not distribute evenly among blood cells or along the blood  
509 vessels. It appeared that A $\beta$  was associated with patches of red cells with reduced and  
510 diffusive HBA staining, an indication of red blood cell damage or hemolysis (Figure  
511 9A, top three panels). Sometimes, specific ring-shape A $\beta$  stained structures were  
512 observed in the blood vessels, which associated with red blood cells (Figure 9A,  
513 bottom). A $\beta$  staining was stronger in blood vessels with diffusive ColIV staining in the  
514 vessel lumens (Figure 9B, top), suggesting an A $\beta$  association with the solubilization  
515 and damage of blood vessel structures. Some strongly stained A $\beta$  aggregates began to  
516 emerge in the fields of diffusive A $\beta$  staining associated with vascular degeneration with  
517 diffusive ColIV staining (Figure 9B, bottom two panels). Thus, the A $\beta$  staining in the



518 blood vessels was closely associated with both red blood cell damage and vascular

519 damage.

520

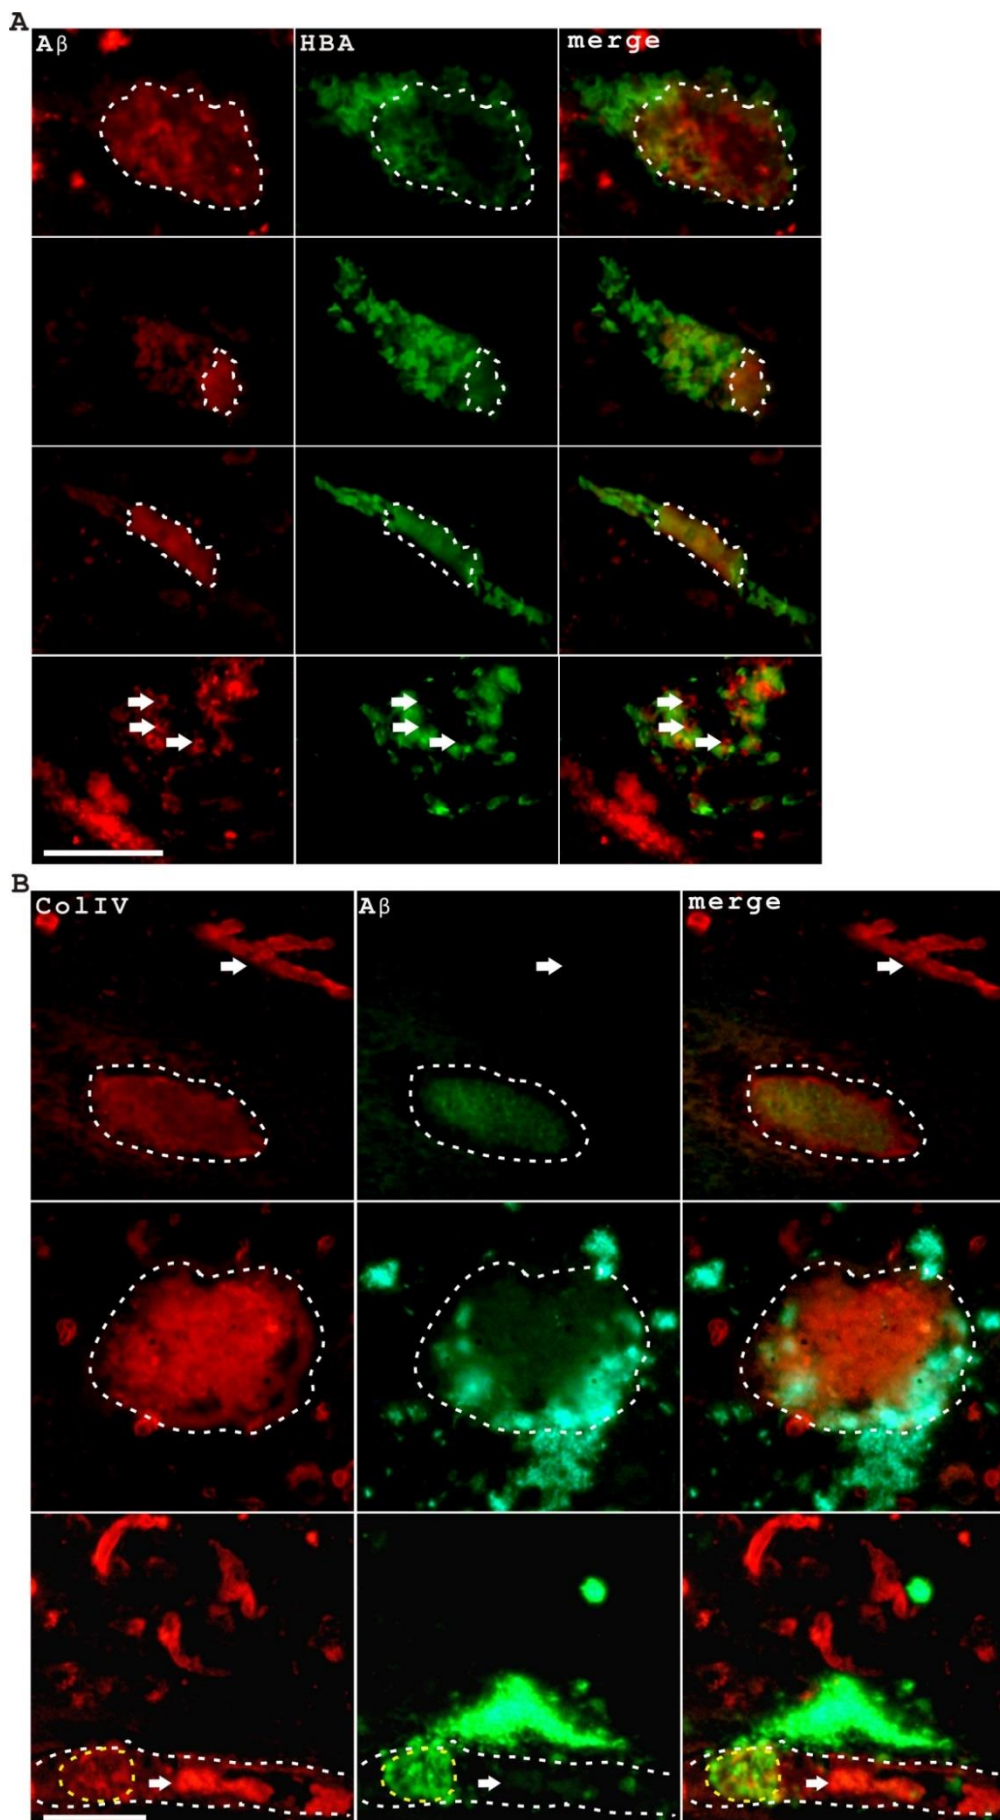

521

522 **Figure 9. A $\beta$  staining in the blood vessels associates with red cell damage and**  
523 **vascular damage. A.** A $\beta$  staining in the blood vessels associated with red cell damage.  
524 Top three panels showed images indicating the association of A $\beta$  staining with weak  
525 and diffusive Hb staining, a sign of red blood cell damage or hemolysis. The bottom  
526 panel showed some ring-shape structures with A $\beta$  staining formed closely around red  
527 blood cells. **B.** A $\beta$  staining in the blood vessels associated with vessel damage. A $\beta$   
528 staining in a blood vessel with diffusive ColIV staining in the vessel lumen (marked  
529 with dashed lines) was compared to a normal looking vessel with clear ColIV vessel  
530 outline staining (marked with an arrow in the top panel). A large area of diffusive ColIV  
531 and A $\beta$  staining with degenerating vessel walls was observed (marked with dashed lines  
532 in the middle panel). Some A $\beta$  aggregations with bright staining also formed within this  
533 area. The bottom panel indicated a vessel with collapsed ColIV-positive components in  
534 the vessel lumen that intermingled with a strong A $\beta$  staining. Some areas of strong  
535 luminal ColIV staining but with weak A $\beta$  staining were also observed. The dashed lines  
536 indicated the blood vessel or the diffusive luminal ColIV-positive areas. Scale bar, 50  
537  $\mu$ m.

538  
539 **A $\beta$  staining in the blood vessels and the in senile plaques is associated with**  
540 **Cathepsin D expression**

541  
542 The enhancement of A $\beta$  staining in damaged red blood cells or in the vascular domains  
543 with vascular damage could be due to either enhanced expression of A $\beta$ -related peptides  
544 or enhanced aggregation of A $\beta$  monomers. A $\beta$  aggregation is depending on both the  
545 synthesis of A $\beta$ -related peptides and also the amyloidgenic activity of beta-site cutting  
546 enzymes. It is well known that hemolysis or vascular damage can activate platelets,  
547 which are able to secrete a large amount of A $\beta$ PP. As for the beta-site cutting enzymes,  
548 besides BACE1, the assumed main beta-site cutting enzyme<sup>34,35</sup>, with ongoing debates,  
549 many other proteases also have potential beta-site cutting activity, such as Cathepsin  
550 D<sup>36-38</sup>, Cathepsin B<sup>39,40</sup>, Carboxypeptidase B<sup>41</sup> and MMP2<sup>42</sup>. Cathepsin D was associated  
551 with AD risk genetically<sup>43,44</sup> and was also found to be present in senile plaques by

552 previous researches<sup>45,46</sup>. In our previous study investigating the relation between  
553 lysosomal Cathepsin D and senile plaque development, we unexpectedly found that  
554 domains of enhanced A $\beta$  staining in the blood vessels coincided with luminal Cathepsin  
555 D expression (Figure 10A, top). Some small but strongly stained A $\beta$  aggregates  
556 emerged in the luminal domains with diffusive Cathepsin D expression (Figure 10A,  
557 second panel). Additionally, in CAA blood vessels, there existed patches of strong  
558 Cathepsin D expression associating with significant A $\beta$  staining (Figure 10A, third  
559 panel). It was also clear that CAA blood vessel walls were Cathepsin D-positive. The  
560 connection between Cathepsin D and A $\beta$  expression was further strengthened when we  
561 extended the investigation into senile plaques (Figure 10B). Very surprisingly, with  
562 optimized immunostaining conditions, we observed that senile plaques came with a  
563 constitutive Cathepsin D expression. Apparently, in senile plaques, there were two  
564 distinct layers of Cathepsin D staining. One layer was a strong, granule type of  
565 Cathepsin D staining, typical of lysosomes, which stained complementary locations  
566 related to A $\beta$  staining in senile plaques (Figure 10B, first, third and fifth panels).  
567 Another type was a weaker and diffusive Cathepsin D expression, which often stained  
568 a large portion of senile plaque area and showed overlapping staining with A $\beta$  (Figure  
569 10B, second, fourth and sixth panels). This constitutive Cathepsin D staining was often  
570 detected in dense-core senile plaques. In diffusive senile plaques, the constitutive  
571 Cathepsin D expression was weak, however, still detectable. The heterogeneity of  
572 constitutive Cathepsin D intensities in senile plaques is probably due to the dynamic  
573 nature of senile plaques, especially because they are self-digestive compartments highly  
574 enriched for proteases such as Cathepsin D. The two-layer Cathepsin D expression  
575 pattern in the senile plaque was further confirmed with a different A $\beta$ /Cathepsin D  
576 primary antibody pair, with similar results shown in Supplementary Figure 4.

577

578 We suspected that the constitutive Cathepsin D expression was coming from hemolysis  
579 and vascular degeneration so that we co-stained Cathepsin D with red blood cell  
580 markers (Figure 11). Cathepsin D expression in the blood vessels correlated with  
581 domains of diffusive and reduced HBA staining, an indication of red cell damage

582 (Figure 11A, top panel). Cathepsin D expression also associated with HBA staining in  
583 CAA and dense-core plaques, which additionally overlapped with plaque MetaBlue  
584 staining (Figure 11A, bottom two panels). Another red blood cell marker HbA1C also  
585 associated with Cathepsin D expression in CAA blood vessels, in diffusive MetaBlue  
586 positive areas, and in dense-core senile plaques with strong MetaBlue signals (Figure  
587 11B). These staining results suggested that the constitutive Cathepsin D in senile  
588 plaques likely derived from hemolysis.

589

590

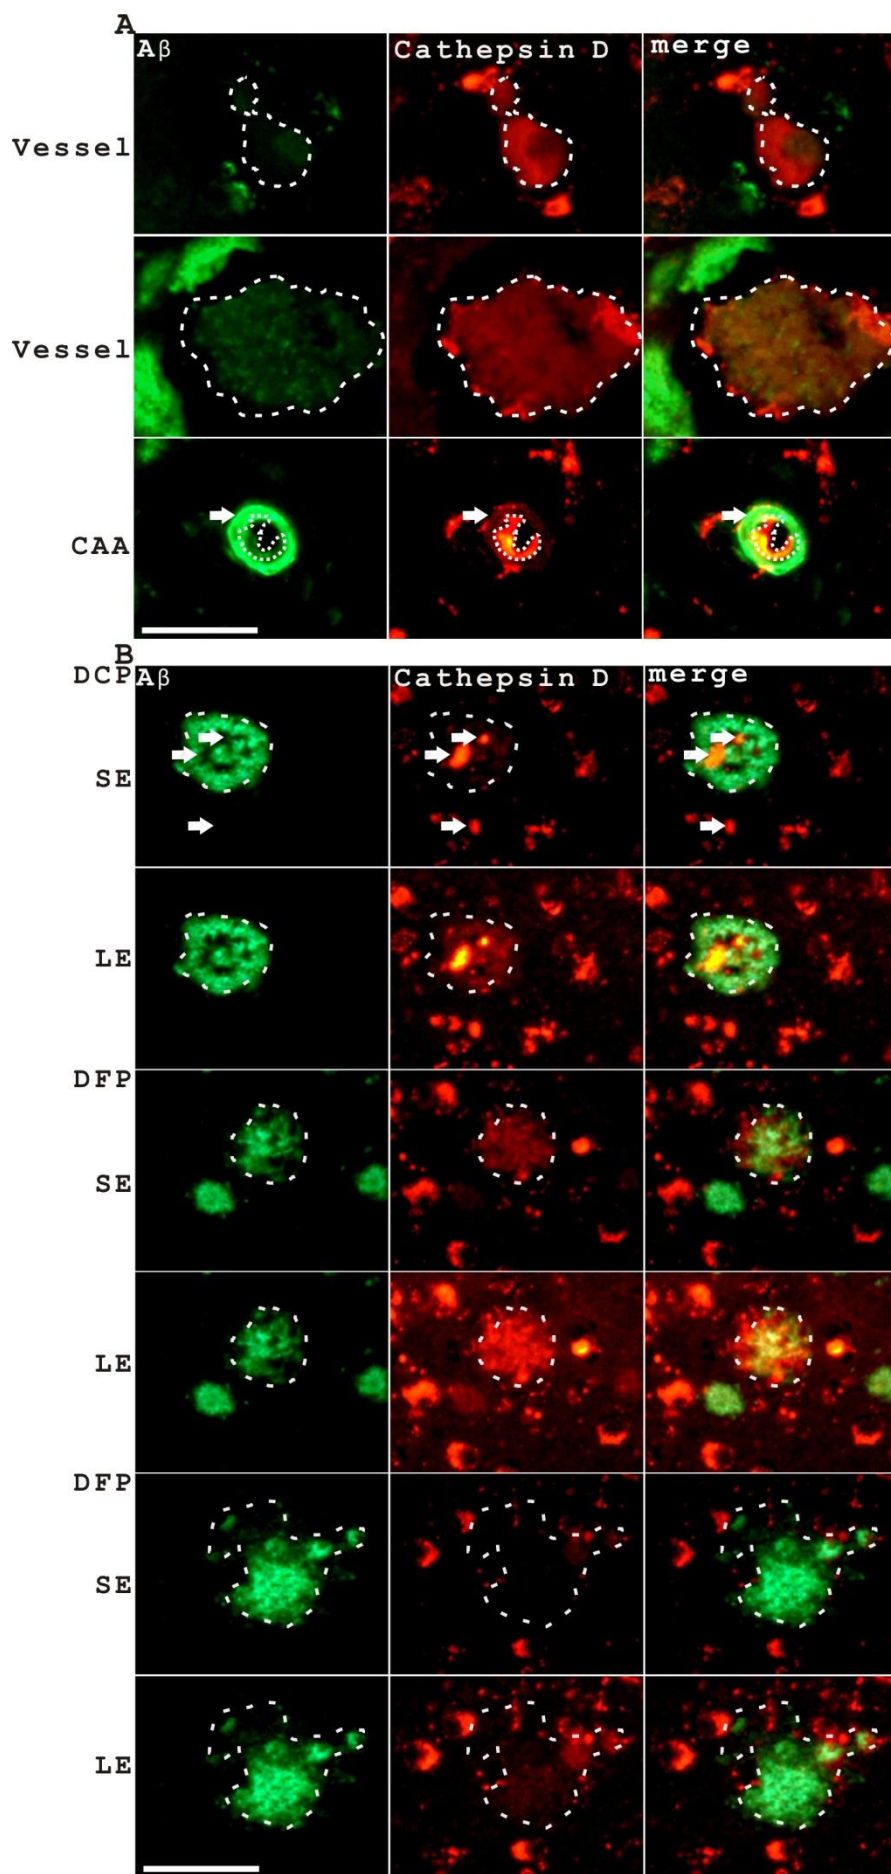



592 **Figure 10. The association of A $\beta$  and Cathepsin D in blood vessels and in senile**  
593 **plaques. A.** Diffusive A $\beta$  staining associated with diffusive Cathepsin D staining in the  
594 blood vessels. Diffusive A $\beta$  staining co-distributed with diffusive Cathepsin D staining  
595 in non-CAA type of blood vessel lumen (top two panels). A $\beta$  staining also associated  
596 with Cathepsin D staining in the lumen of a CAA blood vessel (bottom panel).  
597 Cathepsin D staining on the CAA vessel wall was also observed. Dashed lines indicated  
598 vessel diffusive Cathepsin D and A $\beta$  staining. The arrow indicated a CAA blood vessel.  
599 **B.** Senile plaques overlapped with a constitutive but relatively weak Cathepsin D  
600 expression. A dense-core senile plaque (top two panels, DCP) had two distinct pattern  
601 of Cathepsin D staining. A strong and granule-like Cathepsin D staining showed at  
602 complementary positions relative to A $\beta$  staining with the Cathepsin D image taken at a  
603 short exposure of 0.5 second (SE stands for short exposure) while the exposure setting  
604 for A $\beta$  staining was not changed. A weaker and diffusive Cathepsin D staining co-  
605 distributed with A $\beta$  staining in the senile plaques was also observed with the Cathepsin  
606 D image taken at a longer exposure of 1 second (LE stands for long exposure). The  
607 exposure setting of A $\beta$  images was unchanged. A diffusive plaque (middle two panels,  
608 DFP) also showed a constitutive Cathepsin D staining that co-distributed with A $\beta$   
609 staining but not totally matching the outline of the senile plaque. A large diffusive  
610 plaque (bottom two panels, DFP) with less detectable constitutive Cathepsin D staining.  
611 Dashed lines indicated the regions of senile plaques. The arrows indicated strong and  
612 granule-like Cathepsin D staining. Scale bar, 50  $\mu$ m.

613

614



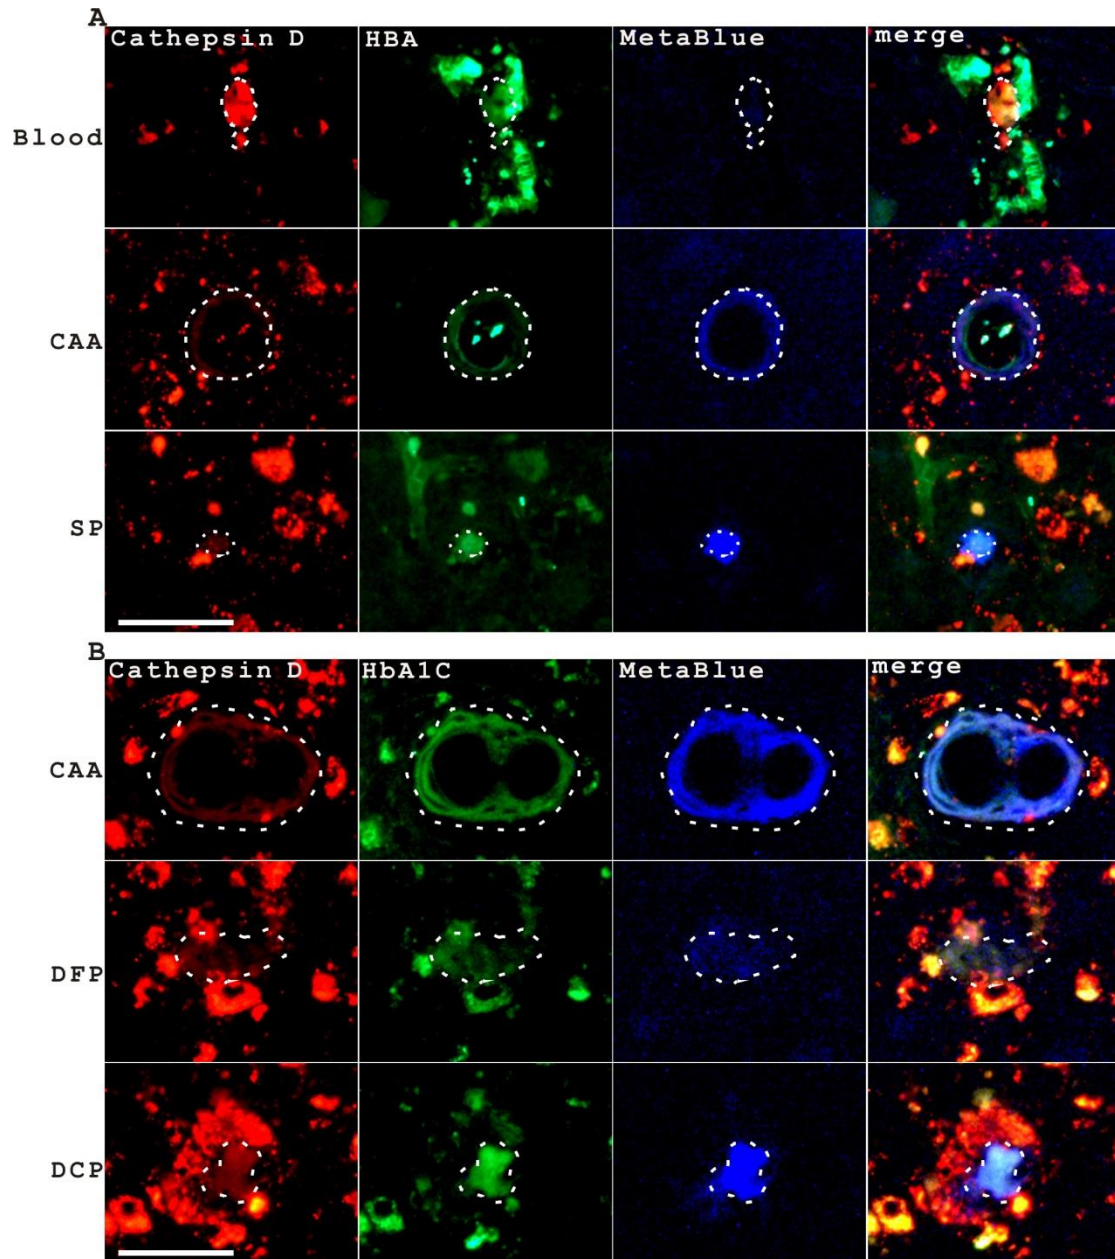

615

616

617 **Figure 11. The association of Cathepsin D and hemoglobin in CAA and in senile**  
618 **plaques. A.** Cathepsin D staining associated with HBA staining in the blood vessels,  
619 CAA and senile plaques. Cathepsin D staining associated with reduced RBC HBA  
620 staining (indicated with dashed lines in the top panel). Cathepsin D staining also  
621 associated with HBA staining in a CAA blood vessel with concurrent MetaBlue staining  
622 (indicated with dashed lines in the middle panel). In the bottom panel, a senile plaque  
623 (SP) (marked with dashed lines) showed both Cathepsin D and HBA staining with also  
624 a strong MetaBlue staining. **B.** Cathepsin D staining associated with HbA1c staining in

625 CAA, diffusive patches and senile plaques. Cathepsin D staining associated with  
626 HbA1C staining in a CAA blood vessel (top panel). A region of diffusive Cathepsin D  
627 staining also co-expressed diffusive HbA1C staining and MetaBlue staining was shown  
628 in the middle panel. A dense-core senile plaque structure with both Cathepsin D and  
629 HbA1C staining and also strong MetaBlue signals were shown at the bottom panel.  
630 Dashed lines indicated the selected regions of Cathepsin D and HbA1C co-expression.  
631 Scale bar, 50  $\mu\text{m}$ .

632

633 **The specific association of Cathepsin D and ApoE with A $\beta$  in hemolysis in AD**  
634 **brain tissues.**

635

636 Since accumulating evidence pointed out the importance of hemolysis during senile  
637 plaque formation, we did a more focused experiment investigating hemolysis in AD  
638 tissues. In a previous investigation regarding the relation between copper ions and  
639 senile plaque formation, we unexpectedly found that a copper iron staining dye named  
640 Rhodanine could be a good histological staining reagent of red blood cells and  
641 hemolysis as shown in Figure 12. Using this dye, we observed that there was  
642 widespread intravascular hemolysis or extravascular hemolysis in AD tissues. This dye  
643 also labels CAA blood vessels, confirming the relation between CAA and hemolysis  
644 (Figure 12A). Rhodanine staining associated with the whole spectrum of A $\beta$  staining  
645 patterns related to senile plaque formation, from initially very weak expression in  
646 phenotypically normal red blood cells to enhanced A $\beta$  staining in hemolysis, to strong  
647 staining in CAA and senile plaques (Figure 12B). In diffusive senile plaques,  
648 Rhodanine staining was very weak, suggesting that Rhodanine-positive substances  
649 might be metabolized after hemolysis during the course of senile plaque development  
650 (Figure 12B, bottom).

651

652 With Rhodanine staining as a tool to detect hemolysis, we analyzed the interaction  
653 between A $\beta$  with Cathepsin D or ApoE during hemolytic events (Figure 13). The  
654 experiment results indicated a tight coupling of the Cathepsin D-A $\beta$  association or

655 ApoE-A $\beta$  association with hemolysis, regardless the hemolysis happened  
656 intravascularly or extravascularly. A $\beta$  staining in hemolysis was usually weaker than  
657 mature senile plaques (Figure 13A, top two panels and Figure 13B, top two panels).  
658 However, we frequently observed some strongly-stained A $\beta$  aggregates began to form  
659 from the weakly-stained A $\beta$ -positive hemolytic areas with overlapping Cathepsin D or  
660 ApoE staining (Figure 13A, bottom panel and Figure 13B, bottom panel). These results  
661 suggested that hemolytic domains might be the initial seeding and fermenting grounds  
662 of amyloid aggregate formation. To our knowledge, this is the first time that a  
663 transitional stage for senile plaque formation has been defined.

664

665



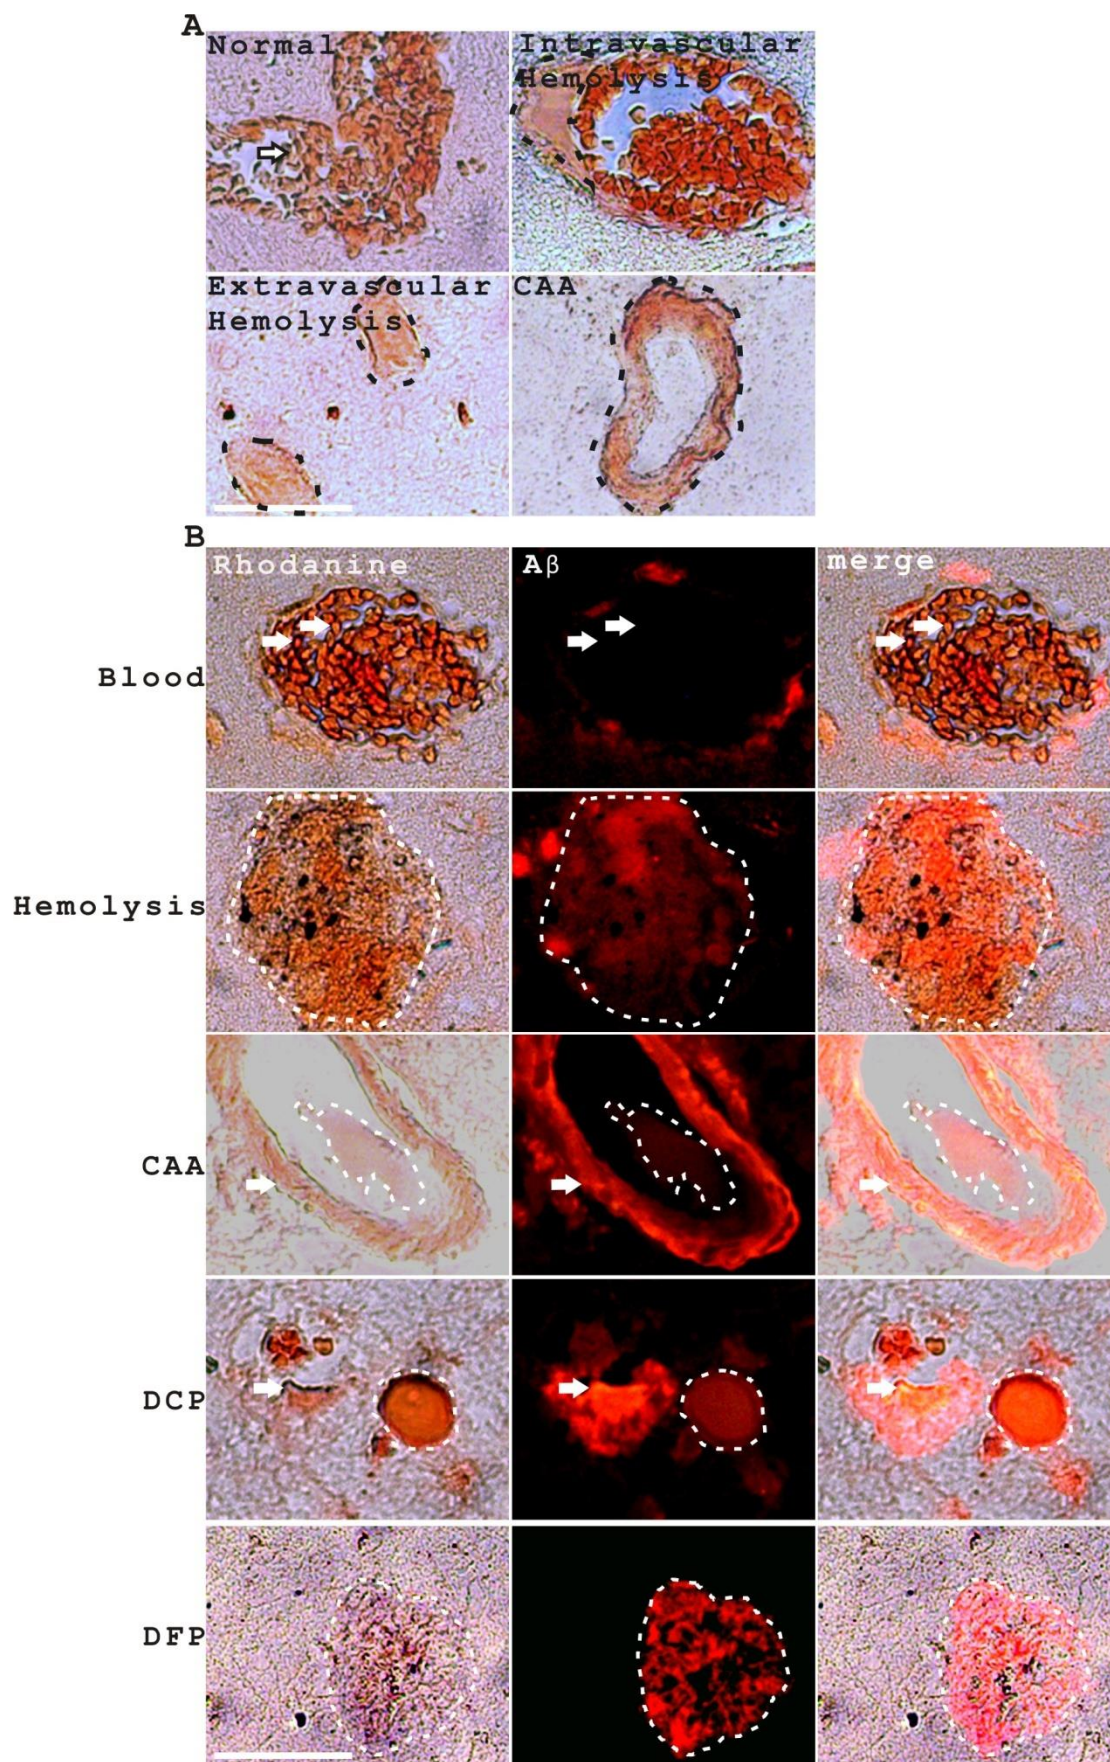

666

667



668 **Figure 12. Rhodanine staining showed widespread hemolysis in AD brain tissues.**

669 **A.** Rhodanine staining was a good marker of normal red blood cells, which also stained  
670 hemolysis, and CAA in AD brain tissues. **B.** Rhodanine staining was present in  
671 normally looking red blood cells without strong A $\beta$  staining and at all different stages  
672 of senile plaque development including hemolysis, CAA with hemolysis, dense-core  
673 plaques (DCP) and diffusive plaques (DFP) with enhanced A $\beta$  staining. Scale bar, 50  
674  $\mu$ m.

675

676

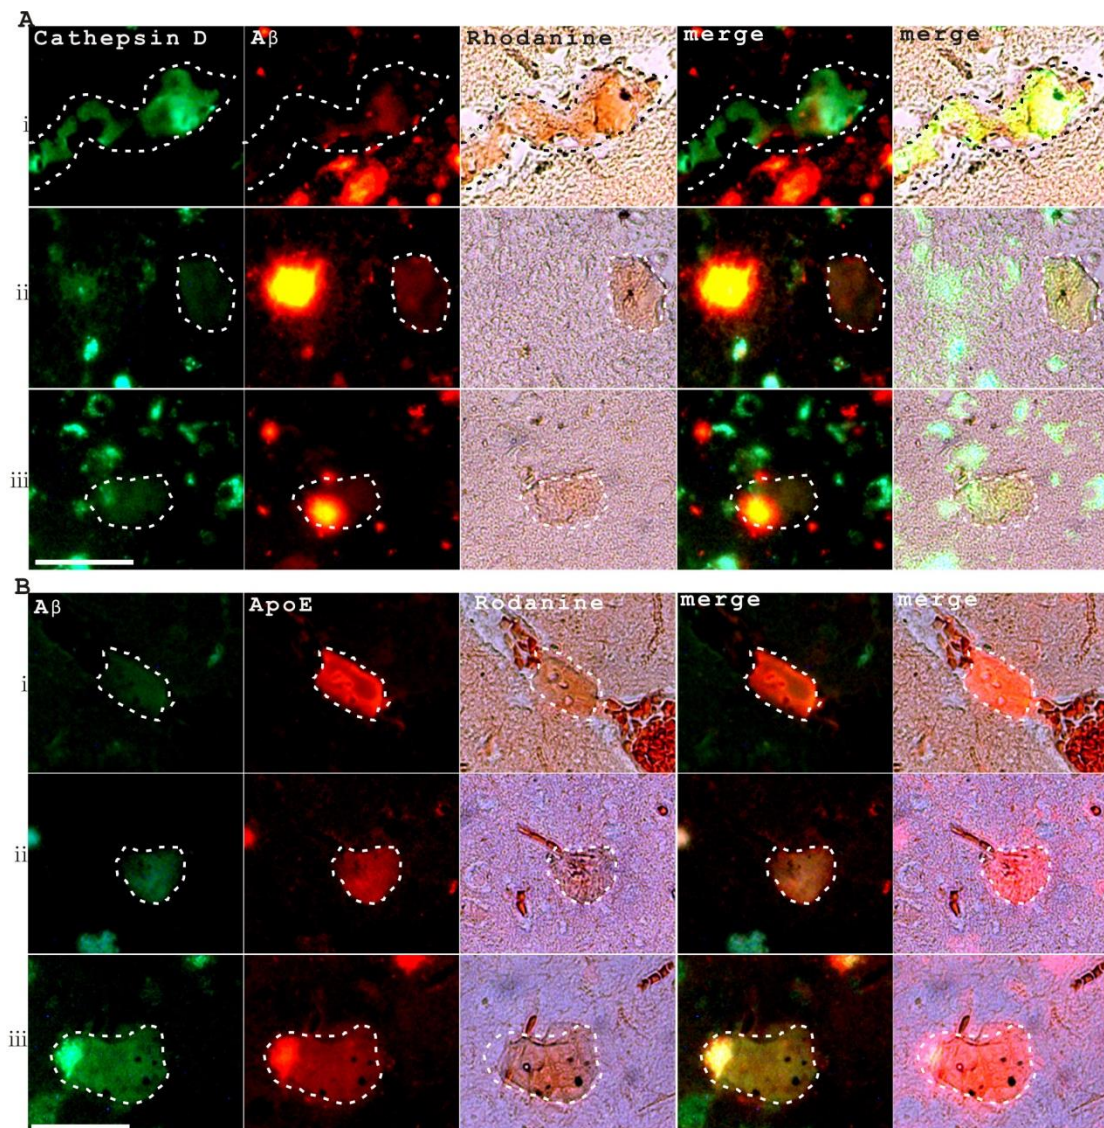

677

678 **Figure 13. Cathepsin D and ApoE both associated with A $\beta$  specifically in hemolysis.**

679 **A.** Cathepsin D associated with A $\beta$  in intravascular hemolysis ( i ) and extravascular  
680 hemolysis ( ii , iii). Some strong A $\beta$  staining was observed in (iii). **B.** ApoE associated

681 with A $\beta$  specifically in intravascular hemolysis ( i ) and in extravascular hemolysis ( ii ,  
682 iii). Some strong A $\beta$  staining was observed in (iii). Scale bar, 50  $\mu$ m.

683

684 **A $\beta$  forms protease-sensitive heterooligomer rapidly with hemoglobin while A $\beta$**   
685 **self-oligomers are protease-resistant.**

686

687 Since the senile plaque formation process might start from hemolysis, we thought the  
688 initial A $\beta$  aggregation might also have something to do with hemolysis. We  
689 hypothesized that HBA physically interacts with A $\beta$  during hemolytic events. The  
690 potential interaction between hemoglobin and A $\beta$  has been studied in the past in a few  
691 published studies<sup>47,48</sup>, but the investigations were still not complete and comprehensive.  
692 We tested this hypothesis further with an aggregation assay in the test tubes. First, we  
693 checked the self-oligomerization of A $\beta$  peptides (Figure 14). Both A $\beta$ 40 and A $\beta$ 42  
694 formed small aggregates immediately soon after dissolving the peptides in DMSO and  
695 diluted into PBS solution at 5  $\mu$ M concentration. A $\beta$ 40 formed aggregates with  
696 increasing size upon incubation up to 3 days, while the sizes of A $\beta$ 42 self-oligomer did  
697 not change significantly upon prolonged incubation (Figure 14A). Both A $\beta$  40 and  
698 A $\beta$ 42 aggregates were resistant to a 15-minute Proteinase K ( PK ) treatment,  
699 suggesting the self aggregates were protease-resistant (Figure 14B).

700



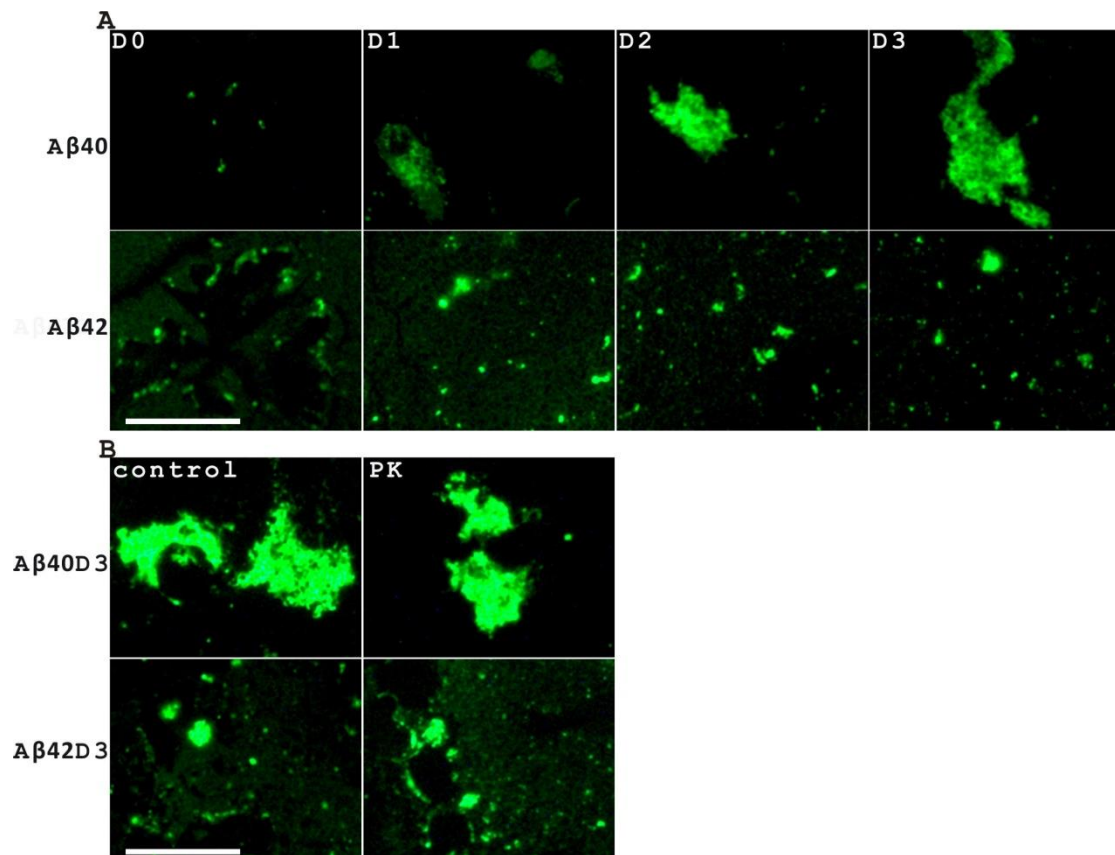

701

702

703 **Figure 14. Aβ40 and Aβ42 form protease-resistant self-oligomers *in vitro*.** A. Aβ40  
704 and Aβ42 formed self-oligomers when incubating in PBS solution for up to 3 days (Day  
705 0 to Day 3) followed with a drying up procedure by droplet evaporation. D0 stands for  
706 Day 0. B. Both Aβ40 and Aβ42 self-oligomers were resistant to Proteinase K (PK),  
707 treatment. Scale bar, 50 μm.

708

709 We then incubated hemoglobin and Aβ40 at a molar ratio of 1:4 (1.25 μM hemoglobin  
710 and 5 μM Aβ40), and checked the aggregation product out of this mixture. We observed  
711 that hemoglobin formed complexes with Aβ40 very quickly. Even in Day 0 samples,  
712 hemoglobin formed large leaf-like or ring-shape complexes with Aβ40 (Figure 15A,  
713 top two panels). Some dot-like structures derived from Aβ40 self-oligomerization were  
714 also present in Day 0 samples (Figure 15A, third panel). Large leaf-like structures and  
715 ring-shape structures were continually present in Day 1, Day 2, Day 3 samples (Figure  
716 15A, bottom four panels). In AD tissue samples, we did not observe large-leaf like  
717 structures with Aβ staining. However, we did observe some ring-shape structures with

718 overlapping staining of A $\beta$  and hemoglobin (Figure 15B). This probably also explained  
719 the ring-shape structures in Figure 9, which suggested that the ring-shape A $\beta$ /Hb  
720 complexes did form in the blood vessels of AD tissues *in vivo*.

721

722

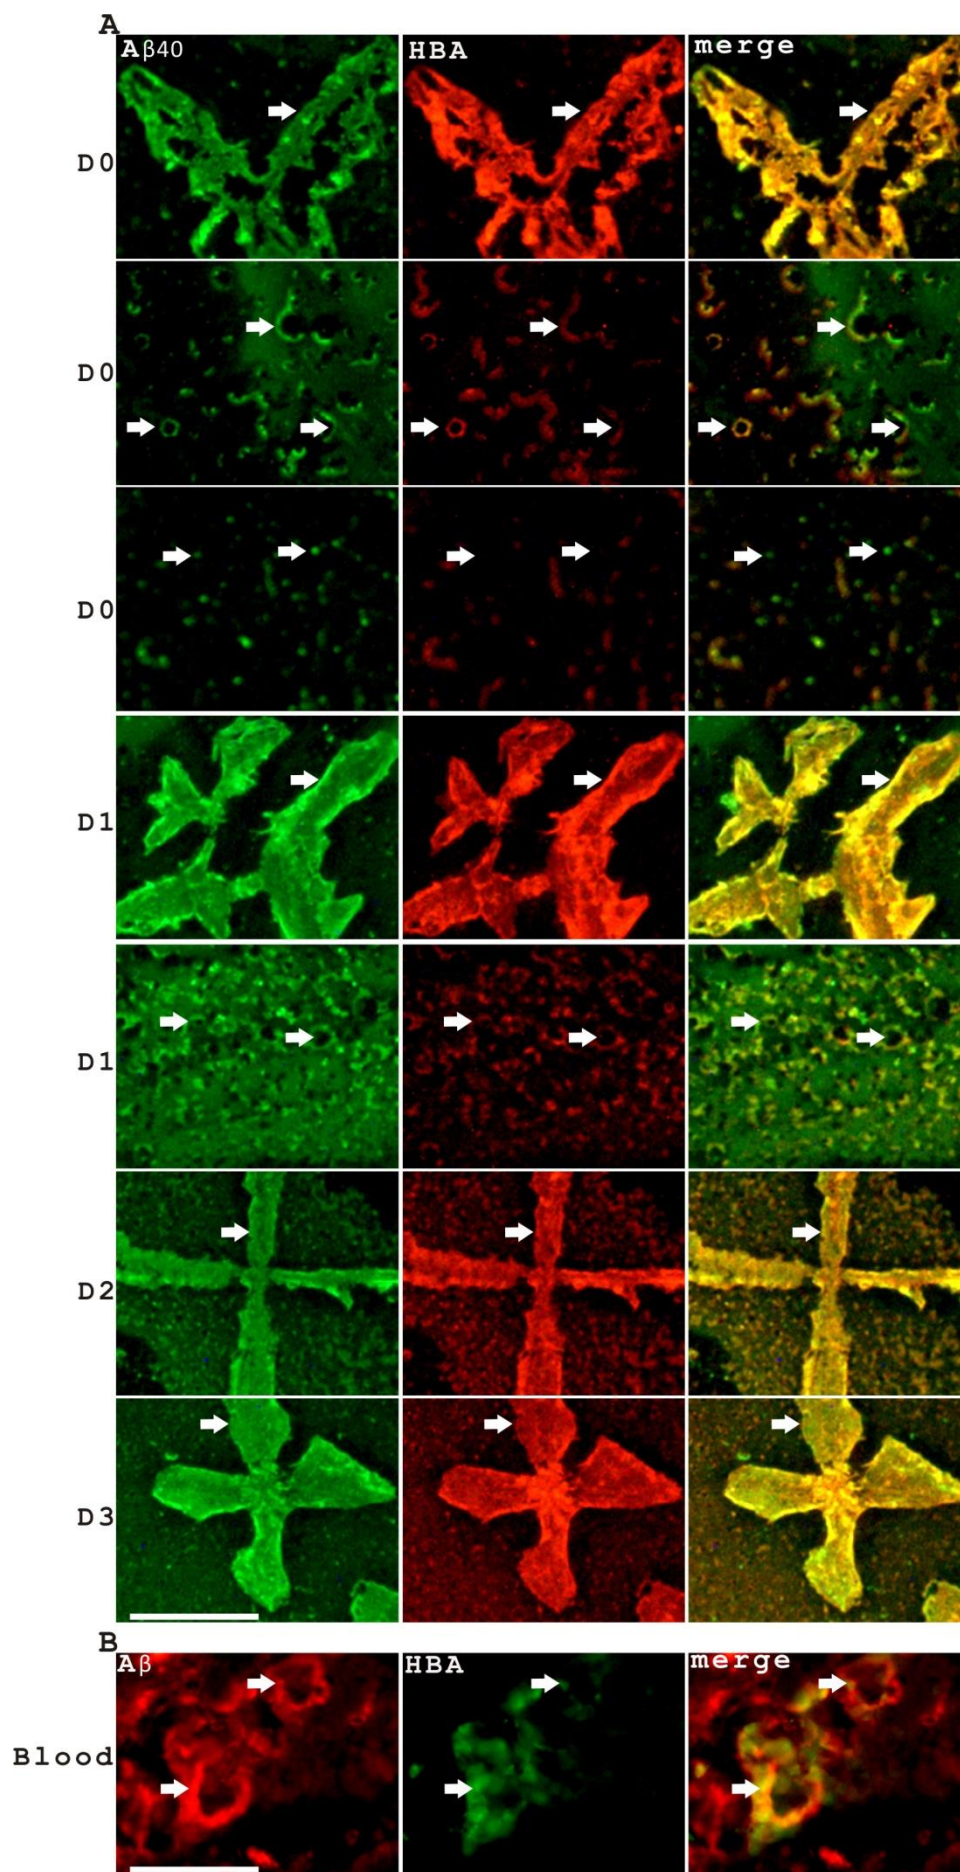

724 **Figure 15. A $\beta$ 40 forms heterooligomer rapidly with hemoglobin. A.** A $\beta$ 40 forms  
725 heterooligomer rapidly with hemoglobin when co-incubating in PBS solution for up to  
726 3 days followed with sample drying by droplet evaporation. Co-immunostaining of A $\beta$   
727 and hemoglobin was shown for Day 0 (top 3 panels), Day 1 (fourth and fifth panels),  
728 Day 2 (the sixth panel) and Day 3 (the seventh panel) samples. Arrows indicated  
729 different structures, such as leaf-shape, ring-shape structures, that co-stained with both  
730 A $\beta$  and HBA (alpha hemoglobin) antibodies. The dot shape structure likely represented  
731 A $\beta$ 40 self-oligomers. Special ring shape structures were indicated with arrows in the  
732 second and fifth panel. **B.** A $\beta$ 40 forms ring-shape structures interacting with  
733 hemoglobin in the lumens of AD patient blood vessels similar to the ring-shape  
734 structures formed in A $\beta$  and hemoglobin mixture samples *in vitro*. Scale bars, 50  $\mu$ m.

735

736 In A $\beta$ 42 and Hb mixed Day 0 samples, we observed leaf-shape, ring-shape, and line-  
737 shape structures with both A $\beta$ 42 and Hb staining (Figure 16). In Day 0 samples, we also  
738 see the existence of A $\beta$ 42 self-oligomers, which was less frequently detected in Day 1,  
739 Day 2 and Day 3 samples (Figure 16A), indicating that A $\beta$ 42/Hb interactions might  
740 compete out A $\beta$ 42 self-oligomerization. Previous studies suggested that hemin inhibits  
741 A $\beta$  aggregation<sup>49,50</sup> and hemoglobin might interact with A $\beta$  through the hemin motif<sup>48</sup>,  
742 suggesting that a hemoglobin inhibition of A $\beta$  self-oligomerization is likely. Large leaf-  
743 shape or smaller ring-shape structures were continually observed in Day 1, Day 2 and  
744 Day 3 samples (Figure 16, bottom three panels). Unlike the protease-resistant A $\beta$ 40 and  
745 A $\beta$ 42 self-oligomers, A $\beta$ 40/Hb and A $\beta$ 42/Hb hetero-complexes were both sensitive to  
746 PK treatment (Figure 16B).

747

748



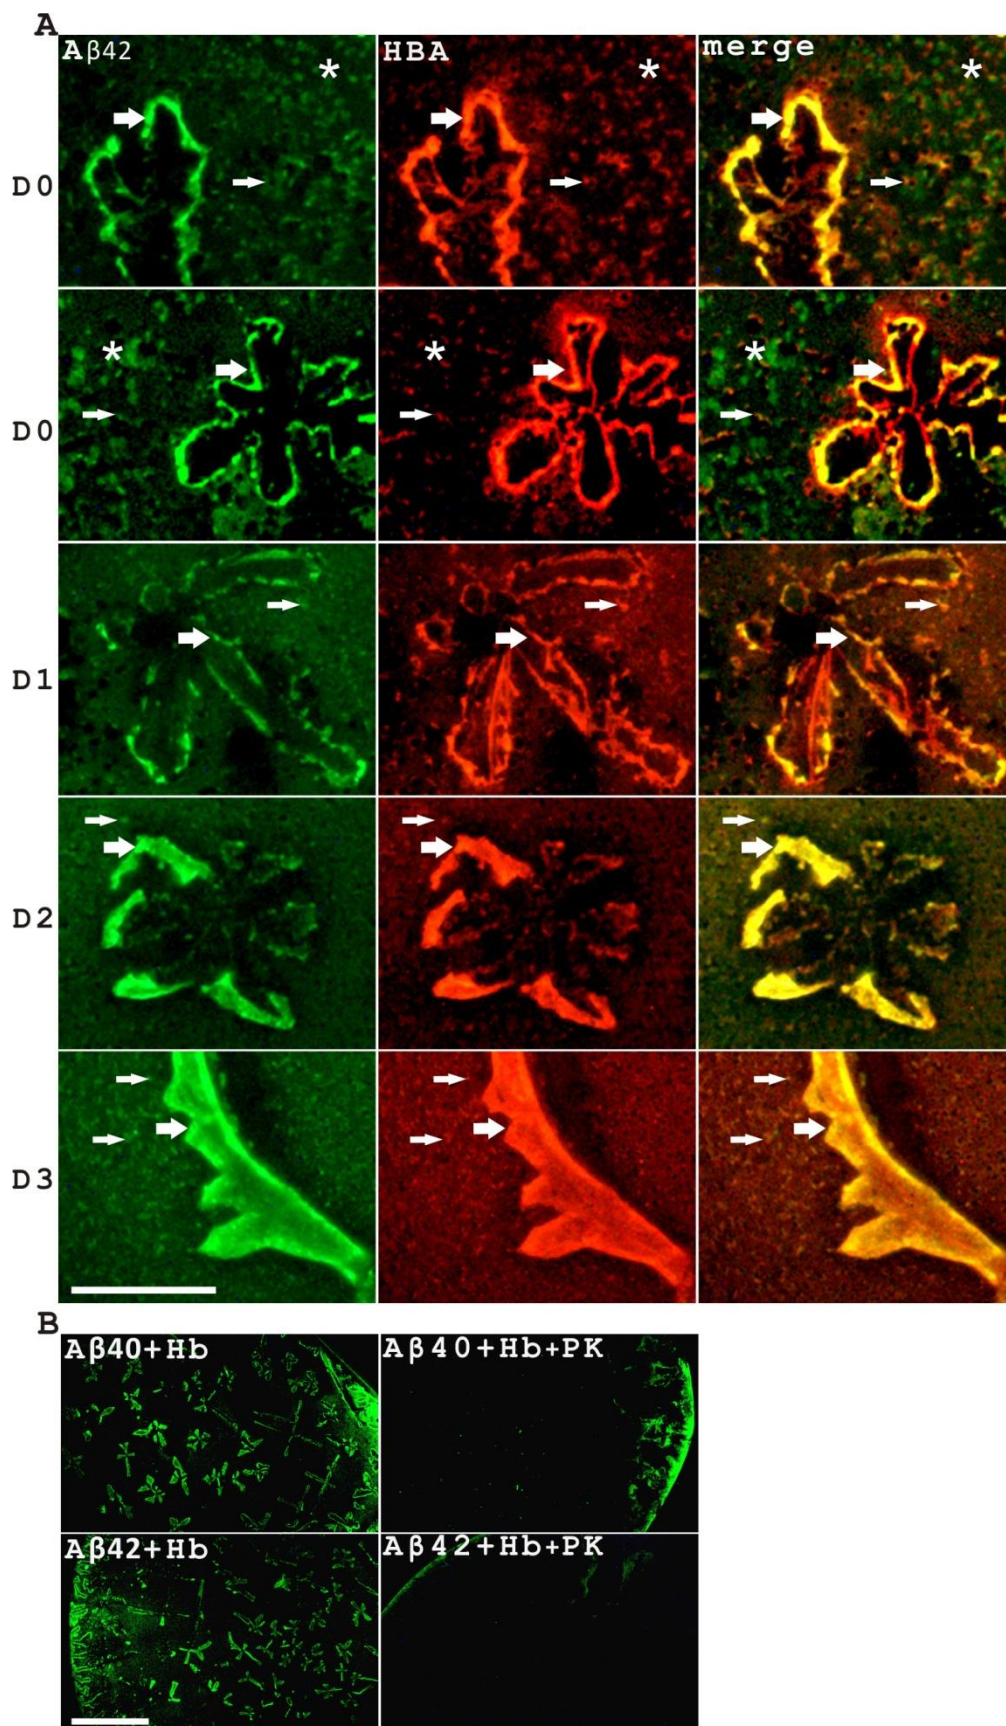

749

750

751 **Figure 16. A $\beta$ 42 forms protease-sensitive heterooligomer rapidly with hemoglobin**

752 **when co-incubating in PBS solution for up to 3 days followed with sample drying**  
753 **by droplet evaporation. A.** A $\beta$ 42 forms heterooligomer rapidly with hemoglobin in  
754 PBS solution. Co-immunostaining of A $\beta$  and hemoglobin was shown for Day 0 (top  
755 two panels), Day 1 (third panel), Day 2 (fourth panel) and Day 3 (fifth panel) samples.  
756 Large arrows indicated relatively large structures while small arrows indicated smaller  
757 structures. Leaf-shape, ring-shape or dot-shape structures were observed. Some self-  
758 oligomers also existed in Day 0 samples, indicated with asterisks. Scale bar, 50  $\mu$ m. **B.**  
759 Both A $\beta$ 40/Hb and A $\beta$ 42/Hb complexes were protease-sensitive with the complexes  
760 illustrated by A $\beta$  antibody staining. PK treatment drastically decreased the signals of  
761 resulting complexes. Scale bar, 200  $\mu$ m.

762

## 763 **Discussion**

764

765 Senile plaque A $\beta$  has been hypothesized to be derived from neural or vascular/blood  
766 source<sup>7,12,15,51</sup>. This study indicated the primary direct source of A $\beta$  is not neural cell  
767 with the evidence showing a lack of substantial overlapping of senile plaque A $\beta$  with  
768 neural markers. Additionally, A $\beta$  expression in neural cells appears to be too low to  
769 account for the high density A $\beta$  expression in senile plaques. Instead, senile plaque A $\beta$   
770 most likely comes from red blood cell-associated A $\beta$  leakage out of damaged blood  
771 vessels. The evidence is the following: Firstly, red blood cells in AD patients were  
772 clearly stained with A $\beta$  antibody, especially in hemolytic red blood cells. Secondly,  
773 strongly-stained A $\beta$  aggregates emerged in the hemolytic regions thus hemolytic areas  
774 were likely the initial seeding grounds of A $\beta$  aggregation. Thirdly, senile plaque A $\beta$  co-  
775 distributed with multiple blood markers such as HbA, HbA1C, ApoE and red blood  
776 cell-associated MetaBlue autofluorescence at multiple stages of senile plaque  
777 development such as CAA, dense-core plaques and diffusive plaques.

778

779 Two important aspects of senile plaque formation are the source of A $\beta$  peptides and the  
780 source of beta-site cutting enzymes. This study indicated that hemolysis could be a  
781 critical step that bring together A $\beta$ -related peptides and Cathepsin D, a potential beta-



782 site cutting enzyme, which might help to initiate the A $\beta$  aggregation process. Platelets  
783 could be an important source of A $\beta$ -related peptides in the blood and in hemolysis. Our  
784 experiment indicated that CD42b-positive platelets are stained positive for A $\beta$  in the  
785 blood vessel lumen and on the blood vessel walls. Since platelets can release A $\beta$ PP in  
786 alpha-granules after platelet activation by hemolysis or vascular damage<sup>26,52-54</sup>, it is  
787 possible that some of A $\beta$  that associated with red blood cells were actually derived from  
788 platelets. HBA, CD42b and Rhodanine staining indicated that both hemolysis and  
789 coagulation were present in AD blood vessels, suggesting that the disrupted blood  
790 homeostasis is a fundamental defect in AD patients. Cathepsin D could be released by  
791 various cell types, including platelets<sup>55</sup>, mast cells<sup>56</sup>, neutrophils<sup>57</sup>, or cytotoxic  
792 lymphocytes<sup>58</sup> that are activated under pathological conditions such as hemolysis or  
793 coagulation. In addition, Cathepsin D could be released from the degenerated cells of  
794 the vessel wall. Along with other factors that might affect blood vessel permeability  
795 such as histamine<sup>59</sup>, the Cathepsin D and A $\beta$  enriched hemolytic mixture could digest  
796 the vasculature and cause enzymatic damage to the blood vessels, which induces further  
797 leakage, extracellular matrix digestion and the formation of CAA. When the blood  
798 vessel integrity is compromised with leakage or all-out degeneration, the Cathepsin D  
799 and A $\beta$  enriched mixture with some invasive ability provided by the proteases entered  
800 the brain parenchyma, promoting the formation of senile plaques. Although Cathepsin  
801 D could be a very important protease for amyloid aggregation, given the drastic changes  
802 and multiple cell types involving hemolysis, vascular degeneration and neuronal  
803 inflammation, the participation of multiple proteases such as BACE1<sup>34,35</sup>, Cathepsin  
804 B<sup>39,40</sup>, Carboxypeptidase B<sup>41</sup> or MMP2<sup>42</sup> in this complicate process is possible.

805

806 Hemolysis likely also initiates many important molecular interactions in the senile  
807 plaques. This study provided both histological and biochemical evidence that A $\beta$  might  
808 interact with hemoglobin physically. During hemolysis, with abundant A $\beta$  and  
809 hemoglobin, A $\beta$ /Hb ring-shape heterooligomers might be early-stage aggregates in the  
810 hemolytic regions. The interaction between A $\beta$  and Hb could be physiologically  
811 important as previous research suggested that A $\beta$  binding reduces hemin toxicity<sup>48</sup>.

812 Although A $\beta$  peptides were frequently shown to be cytotoxic to neural cells *in vitro*,  
813 since A $\beta$ /Hb complex formation can compete with A $\beta$  self-oligomerization, the  
814 possibility of senile plaques serving as A $\beta$  peptide reservoirs to prevent Hb-related  
815 toxicity in future hemorrhage events should not be excluded. Our experiment showed  
816 that A $\beta$ /Hb complex was sensitive to protease digestion but A $\beta$  self-oligomers were  
817 protease resistant, which explains why A $\beta$  stands out as the everlasting and more stable  
818 component of senile plaques. The association between ApoE and A $\beta$  was also  
819 happening during hemolysis and this association continued to be present in CAA and  
820 senile plaques, indicating ApoE is also an early responder to hemolysis and an  
821 important component of the senile plaque. The presence of ApoE in the senile plaques  
822 has also been reported previously by other research groups<sup>60,61</sup>. In addition, ApoE  
823 knockout mice have a strong atherosclerosis phenotype, emphasizing its importance as  
824 a blood homeostasis regulator<sup>62-64</sup>.

825

826 Previous studies in AD patients and in mouse models of AD have already found that  
827 dense-core plaques are centered on vessel walls<sup>13,14</sup>. These studies suggested that  
828 perturbed vascular transport and/or perivascular enrichment of neuronal A $\beta$  leads to the  
829 formation of vasocentric dense plaques. Our results showed that many dense-core  
830 plaques are intermingled with degenerated vessel fragments by ColIV, ACTA2 and  
831 LRP1 staining, providing further evidence that vascular degeneration is intrinsically  
832 linked with senile plaque formation. However, we think that senile plaque A $\beta$  is  
833 primarily derived from the blood source although the additional contribution of A $\beta$  from  
834 vascular cells or neural cells is possible. A series of studies by Dr. Cullen's group using  
835 thick brain tissue sections showed a clear anatomic link between microhemorrhage with  
836 senile plaque formation and also Tau phosphorylation<sup>12,17,18</sup>. Yet, in these studies, the  
837 exact source of A $\beta$  was still not clear. With Rhodanine staining instead of Perls staining,  
838 our study provided a direct link between blood A $\beta$  expression and hemolysis,  
839 suggesting that damaged red blood cells were enriched for A $\beta$ . We also established a  
840 link between enhanced A $\beta$  staining with vascular damage, which is not surprising since  
841 blood cell abnormality is frequently linked with vascular damage. In addition, we

842 provided biochemical evidence that hemoglobin might form complexes directly with  
843 A $\beta$ . In summary, our data suggested that the senile plaque formation is primarily  
844 induced by the leakage of hemolytic red blood cells along with other blood contents  
845 with CAA and vascular degeneration as intermediate steps. Although amyloid cascade  
846 hypothesis is an attractive and straightforward hypothesis as it stands, however, the  
847 mechanism of Alzheimer's disease might be much more complicated than previously  
848 thought. The AD research field should pay careful attention to the accumulating  
849 substantial evidence showing the linkage between senile plaque formation and vascular  
850 degeneration and blood abnormalities such as microhemorrhage and hemolysis and be  
851 open-minded about revisions on current concepts.

852

853 The findings that senile plaques are associated with specific blue autofluorescence are  
854 intriguing. There have been a number of studies related to senile plaque blue  
855 autofluorescence materials (temporarily named as MetaBlue in this article) in the  
856 past<sup>22,23,65</sup>. An early study reported that the blue autofluorescence was associated with  
857 senile plaques but not CAA<sup>22</sup>. Two more recent studies found that the blue  
858 autofluorescence was associated with both senile plaques and CAA<sup>23,65</sup>. Our study  
859 additionally found that MetaBlue was not only associated with CAA and senile plaques  
860 but also directly associated with red blood cells. The existence of MetaBlue  
861 fluorescence in different kind of senile plaques with different sizes suggests that  
862 MetaBlue could be an important component of senile plaques. The exact identity of  
863 MetaBlue is unknown. MetaBlue could be an oxidative-stress related metabolite since  
864 previous literature indicated that the blue autofluorescence of amyloid peptides could  
865 be associated with tyrosine oxidation<sup>66</sup>. To isolate MetaBlue materials and to elucidate  
866 the true identity of MetaBlue will likely leads to deeper understanding of AD  
867 pathogenesis.

868

869 **Data and materials availability.** All data needed to evaluate the conclusions in this  
870 paper are present either in the main text or in the supplementary materials.

871

872 **Supplementary Materials.**

873 Supplementary Figures 1-4

874

875 **Acknowledgements:** We want to thank the great help from Dr. Ma Chao and Dr. Qiu  
876 Wenying for providing AD tissue sections from National Human Brain Bank for  
877 Development and Function, Chinese Academy of Medical Sciences and Peking Union  
878 Medical College, Beijing, China. Additionally, we want to thank Dr. Xiangli Zhang of  
879 Shandong University for valuable discussions. We also want to thank Shunjie Wu from  
880 Keyence Co. for allowing us to use their Keyence BZ-X800 microscope without charge.  
881 Furthermore, we want to thank Housheng Wang, Lu Xu, Wenting Xuan, Pingxin Liu,  
882 Xiaoyi Bao, and Jun Wang for excellent lab assistance. **Funding:** This work was  
883 supported by National Natural Science Foundation of China No. 81472235 (H.F.),  
884 Shanghai Jiao Tong University Research Grant YG2017MS71 (D.P. and H.F.). **Author**  
885 **contributions:** H.F. conceived the study; H. F. designed and supervised the  
886 experiments; H.F. and J. L. performed the experiments; H. F., J. L., D.P., W. J., G. G.,  
887 D. C. did the data analysis; H. F. wrote the manuscript; All authors reviewed the  
888 manuscript. **Competing interests:** Authors declare no competing interests.

889

890 **References:**

891

- 892 1 Lane, C. A., Hardy, J. & Schott, J. M. Alzheimer's disease. *Eur J Neurol* **25**, 59-70,  
893 doi:10.1111/ene.13439 (2018).
- 894 2 Attems, J., Lintner, F. & Jellinger, K. A. Amyloid beta peptide 1-42 highly correlates with capillary  
895 cerebral amyloid angiopathy and Alzheimer disease pathology. *Acta neuropathologica* **107**,  
896 283-291, doi:10.1007/s00401-004-0822-6 (2004).
- 897 3 van Helmond, Z., Miners, J. S., Kehoe, P. G. & Love, S. Oligomeric Aβ in Alzheimer's disease:  
898 relationship to plaque and tangle pathology, APOE genotype and cerebral amyloid angiopathy.  
899 *Brain Pathol* **20**, 468-480, doi:10.1111/j.1750-3639.2009.00321.x (2010).
- 900 4 Glenner, G. G., Henry, J. H. & Fujihara, S. Congophilic angiopathy in the pathogenesis of  
901 Alzheimer's degeneration. *Annales de pathologie* **1**, 120-129 (1981).
- 902 5 Glenner, G. G. & Wong, C. W. Alzheimer's disease: initial report of the purification and  
903 characterization of a novel cerebrovascular amyloid protein. *Biochemical and biophysical*  
904 *research communications* **120**, 885-890, doi:10.1016/s0006-291x(84)80190-4 (1984).
- 905 6 Masters, C. L. *et al.* Amyloid plaque core protein in Alzheimer disease and Down syndrome.

- 906 *Proceedings of the National Academy of Sciences of the United States of America* **82**, 4245-  
907 4249, doi:10.1073/pnas.82.12.4245 (1985).
- 908 7 Hardy, J. A. & Higgins, G. A. Alzheimer's disease: the amyloid cascade hypothesis. *Science* **256**,  
909 184-185, doi:10.1126/science.1566067 (1992).
- 910 8 Hardy, J. Alzheimer's disease: the amyloid cascade hypothesis: an update and reappraisal.  
911 *Journal of Alzheimer's disease : JAD* **9**, 151-153, doi:10.3233/jad-2006-9s317 (2006).
- 912 9 Miyakawa, T., Shimoji, A., Kuramoto, R. & Higuchi, Y. The relationship between senile plaques  
913 and cerebral blood vessels in Alzheimer's disease and senile dementia. Morphological  
914 mechanism of senile plaque production. *Virchows Archiv. B, Cell pathology including molecular*  
915 *pathology* **40**, 121-129, doi:10.1007/bf02932857 (1982).
- 916 10 Kawai, M., Kalaria, R. N., Harik, S. I. & Perry, G. The relationship of amyloid plaques to cerebral  
917 capillaries in Alzheimer's disease. *The American journal of pathology* **137**, 1435-1446 (1990).
- 918 11 Sparks, D. L., Kuo, Y. M., Roher, A., Martin, T. & Lukas, R. J. Alterations of Alzheimer's disease in  
919 the cholesterol-fed rabbit, including vascular inflammation. Preliminary observations. *Annals*  
920 *of the New York Academy of Sciences* **903**, 335-344, doi:10.1111/j.1749-6632.2000.tb06384.x  
921 (2000).
- 922 12 Cullen, K. M., Kocsi, Z. & Stone, J. Microvascular pathology in the aging human brain: Evidence  
923 that senile plaques are sites of microhaemorrhages. *Neurobiol Aging* **27**, 1786-1796,  
924 doi:10.1016/j.neurobiolaging.2005.10.016 (2006).
- 925 13 Kumar-Singh, S. *et al.* Dense-core senile plaques in the Flemish variant of Alzheimer's disease  
926 are vasocentric. *The American journal of pathology* **161**, 507-520, doi:10.1016/S0002-  
927 9440(10)64207-1 (2002).
- 928 14 Kumar-Singh, S. *et al.* Dense-core plaques in Tg2576 and PSAPP mouse models of Alzheimer's  
929 disease are centered on vessel walls. *The American journal of pathology* **167**, 527-543,  
930 doi:10.1016/S0002-9440(10)62995-1 (2005).
- 931 15 Bu, X. L. *et al.* Blood-derived amyloid-beta protein induces Alzheimer's disease pathologies.  
932 *Molecular psychiatry* **23**, 1948-1956, doi:10.1038/mp.2017.204 (2018).
- 933 16 Ryu, J. K. & McLarnon, J. G. A leaky blood-brain barrier, fibrinogen infiltration and microglial  
934 reactivity in inflamed Alzheimer's disease brain. *Journal of cellular and molecular medicine* **13**,  
935 2911-2925, doi:10.1111/j.1582-4934.2008.00434.x (2009).
- 936 17 Cullen, K. M., Kócsi, Z. & Stone, J. Pericapillary Haem-Rich Deposits: Evidence for  
937 Microhaemorrhages in Aging Human Cerebral Cortex. *Journal of Cerebral Blood Flow &*  
938 *Metabolism* **25**, 1656-1667, doi:10.1038/sj.jcbfm.9600155 (2005).
- 939 18 Hansra, G. K. *et al.* The neuritic plaque in Alzheimer's disease: perivascular degeneration of  
940 neuronal processes. *Neurobiol Aging* **82**, 88-101,  
941 doi:https://doi.org/10.1016/j.neurobiolaging.2019.06.009 (2019).
- 942 19 Sun, H. L. *et al.* Blood cell-produced amyloid-beta induces cerebral Alzheimer-type pathologies  
943 and behavioral deficits. *Mol Psychiatr*, doi:10.1038/s41380-020-0842-1 (2020).
- 944 20 Fu, H. *et al.* Persisting and Increasing Neutrophil Infiltration Associates with Gastric  
945 Carcinogenesis and E-cadherin Downregulation. *Scientific reports* **6**, 29762,  
946 doi:10.1038/srep29762 (2016).
- 947 21 Wallin, C., Luo, J. H., Jarvet, J., Warmlander, S. K. T. S. & Graslund, A. The Amyloid-beta Peptide  
948 in Amyloid Formation Processes: Interactions with Blood Proteins and Naturally Occurring  
949 Metal Ions. *Isr J Chem* **57**, 674-685, doi:10.1002/ijch.201600105 (2017).

- 950 22 Dowson, J. H. A sensitive method for the demonstration of senile plaques in the dementing  
951 brain. *Histopathology* **5**, 305-310, doi:10.1111/j.1365-2559.1981.tb01789.x (1981).
- 952 23 Gao, Y. *et al.* Imaging and Spectral Characteristics of Amyloid Plaque Autofluorescence in Brain  
953 Slices from the APP/PS1 Mouse Model of Alzheimer's Disease. *Neuroscience bulletin* **35**, 1126-  
954 1137, doi:10.1007/s12264-019-00393-6 (2019).
- 955 24 Cohen, R. M. *et al.* Red cell life span heterogeneity in hematologically normal people is  
956 sufficient to alter HbA1c. *Blood* **112**, 4284-4291, doi:10.1182/blood-2008-04-154112 (2008).
- 957 25 Holtzman, D. M. Role of apoE/A beta interactions in the pathogenesis of Alzheimer's disease  
958 and cerebral amyloid angiopathy. *J. Mol. Neurosci.* **17**, 147-155, doi:10.1385/jmn:17:2:147  
959 (2001).
- 960 26 Li, Q. X. *et al.* Membrane-associated forms of the beta A4 amyloid protein precursor of  
961 Alzheimer's disease in human platelet and brain: surface expression on the activated human  
962 platelet. *Blood* **84**, 133-142 (1994).
- 963 27 Koupenova, M., Kehrel, B. E., Corkrey, H. A. & Freedman, J. E. Thrombosis and platelets: an  
964 update. *European heart journal* **38**, 785-791, doi:10.1093/eurheartj/ehw550 (2017).
- 965 28 Ferguson, D. J. Acute intravascular hemolysis after a platelet transfusion. *CMAJ : Canadian  
966 Medical Association journal = journal de l'Association medicale canadienne* **138**, 523-524  
967 (1988).
- 968 29 Weinstein, L. Syndrome of hemolysis, elevated liver enzymes, and low platelet count: A severe  
969 consequence of hypertension in pregnancy. *Am J Obstet Gynecol* **193**, 859-860,  
970 doi:10.1016/j.ajog.2005.02.113 (2005).
- 971 30 Helms, C. C. *et al.* Mechanisms of hemolysis-associated platelet activation. *Journal of  
972 Thrombosis and Haemostasis* **11**, 2148-2154, doi:10.1111/jth.12422 (2013).
- 973 31 Scheibel, A. B. Alterations of the cerebral capillary bed in the senile dementia of Alzheimer. *The  
974 Italian Journal of Neurological Sciences* **8**, 457-463, doi:10.1007/bf02334602 (1987).
- 975 32 Bu, G., Cam, J. & Zerbinatti, C. LRP in amyloid-beta production and metabolism. *Ann N Y Acad  
976 Sci*, 005 (2006).
- 977 33 Storck, S. E. *et al.* Endothelial LRP1 transports amyloid-beta(1-42) across the blood-brain barrier.  
978 *J. Clin. Invest.* **126**, 123-136, doi:10.1172/jci81108 (2016).
- 979 34 Yan, R. *et al.* Membrane-anchored aspartyl protease with Alzheimer's disease  $\beta$ -secretase  
980 activity. *Nature* **402**, 533-537, doi:10.1038/990107 (1999).
- 981 35 Cai, H. *et al.* BACE1 is the major  $\beta$ -secretase for generation of A $\beta$  peptides by neurons. *Nature  
982 Neuroscience* **4**, 233-234, doi:10.1038/85064 (2001).
- 983 36 Chevallier, N. *et al.* Cathepsin D displays in vitro beta-secretase-like specificity. *Brain Res.* **750**,  
984 11-19, doi:10.1016/s0006-8993(96)01330-3 (1997).
- 985 37 Schechter, I. & Ziv, E. Kinetic properties of cathepsin D and BACE 1 indicate the need to search  
986 for additional beta-secretase candidate(s). *Biol. Chem.* **389**, 313-320, doi:10.1515/bc.2008.025  
987 (2008).
- 988 38 Evin, G. *et al.* Candidate gamma-secretases in the generation of the carboxyl terminus of the  
989 Alzheimer's disease beta-A4 amyloid: Possible involvement of cathepsin D. *Biochemistry* **34**,  
990 14185-14192, doi:10.1021/bi00043a024 (1995).
- 991 39 Schechter, I. & Ziv, E. Cathepsins S, B and L with aminopeptidases display  $\beta$ -secretase activity  
992 associated with the pathogenesis of Alzheimer's disease. **392**, 555-569,  
993 doi:doi:10.1515/bc.2011.054 (2011).



- 994 40 Hook, V. Y. H., Kindy, M., Reinheckel, T., Peters, C. & Hook, G. Genetic cathepsin B deficiency  
995 reduces beta-amyloid in transgenic mice expressing human wild-type amyloid precursor  
996 protein. *Biochem. Biophys. Res. Commun.* **386**, 284-288, doi:10.1016/j.bbrc.2009.05.131  
997 (2009).
- 998 41 Matsumoto, A., Itoh, K. & Matsumoto, R. A novel carboxypeptidase B that processes native  
999 beta-amyloid precursor protein is present in human hippocampus. *Eur. J. Neurosci.* **12**, 227-  
1000 238, doi:10.1046/j.1460-9568.2000.00908.x (2000).
- 1001 42 Lepage, R. N. *et al.* Gelatinase A possesses a beta-secretase-like activity in cleaving the amyloid  
1002 protein precursor of Alzheimer's disease. *FEBS Letters* **377**, 267-270, doi:10.1016/0014-  
1003 5793(95)01358-x (1995).
- 1004 43 Papassotiropoulos, A. *et al.* Genetic polymorphism of cathepsin D is strongly associated with  
1005 the risk for developing sporadic Alzheimer's disease. *Neuroscience Letters* **262**, 171-174,  
1006 doi:https://doi.org/10.1016/S0304-3940(99)00071-3 (1999).
- 1007 44 Schuur, M. *et al.* Cathepsin D gene and the risk of Alzheimer's disease: A population-based  
1008 study and meta-analysis. *Neurobiology of Aging* **32**, 1607-1614,  
1009 doi:https://doi.org/10.1016/j.neurobiolaging.2009.10.011 (2011).
- 1010 45 Bernstein, H. G., Bruszis, S., Schmidt, D., Wiederanders, B. & Dorn, A. Immunodetection of  
1011 cathepsin D in neuritic plaques found in brains of patients with dementia of Alzheimer type.  
1012 *Journal fur Hirnforschung* **30**, 613-618 (1989).
- 1013 46 Cataldo, A. M., Barnett, J. L., Mann, D. M. A. & Nixon, R. A. Colocalization of Lysosomal  
1014 Hydrolase and  $\beta$ -Amyloid in Diffuse Plaques of the Cerebellum and Striatum in Alzheimer's  
1015 Disease and Down's Syndrome. *Journal of Neuropathology & Experimental Neurology* **55**, 704-  
1016 715, doi:10.1097/00005072-199606000-00004 (1996).
- 1017 47 Wu, C. W. *et al.* Hemoglobin promotes Abeta oligomer formation and localizes in neurons and  
1018 amyloid deposits. *Neurobiology of disease* **17**, 367-377, doi:10.1016/j.nbd.2004.08.014 (2004).
- 1019 48 Chuang, J. Y. *et al.* Interactions between amyloid-beta and hemoglobin: implications for  
1020 amyloid plaque formation in Alzheimer's disease. *PLoS one* **7**, e33120,  
1021 doi:10.1371/journal.pone.0033120 (2012).
- 1022 49 Howlett, D., Cutler, P., Heales, S. & Camilleri, P. Hemin and related porphyrins inhibit beta-  
1023 amyloid aggregation. *FEBS letters* **417**, 249-251 (1997).
- 1024 50 Liu, Y. *et al.* Hemin as a generic and potent protein misfolding inhibitor. *Biochemical and*  
1025 *biophysical research communications* **454**, 295-300, doi:10.1016/j.bbrc.2014.10.062 (2014).
- 1026 51 de la Torre, J. C. & Aliev, G. Alzheimer's disease is a vascular disorder with neurodegenerative  
1027 consequences. *J Neurol Sci* **229**, 305-306 (2005).
- 1028 52 Smith, R. P. & Broze, G. J., Jr. Characterization of platelet-releasable forms of beta-amyloid  
1029 precursor proteins: the effect of thrombin. *Blood* **80**, 2252-2260 (1992).
- 1030 53 Van Nostrand, W. E., Schmaier, A. H., Farrow, J. S. & Cunningham, D. D. Platelet protease nexin-  
1031 2/amyloid beta-protein precursor. Possible pathologic and physiologic functions. *Annals of the*  
1032 *New York Academy of Sciences* **640**, 140-144, doi:10.1111/j.1749-6632.1991.tb00205.x (1991).
- 1033 54 Canobbio, I. *et al.* Platelet amyloid precursor protein is a modulator of venous  
1034 thromboembolism in mice. *Blood* **130**, 527-536, doi:10.1182/blood-2017-01-764910 (2017).
- 1035 55 Rendu, F. & Brohard-Bohn, B. The platelet release reaction: granules' constituents, secretion  
1036 and functions. *Platelets* **12**, 261-273, doi:10.1080/09537100120068170 (2001).
- 1037 56 Puri, N. & Roche, P. A. Mast cells possess distinct secretory granule subsets whose exocytosis

1038 is regulated by different SNARE isoforms. *Proc Natl Acad Sci U S A* **105**, 2580-2585 (2008).  
1039 57 Conus, S. *et al.* Caspase-8 is activated by cathepsin D initiating neutrophil apoptosis during the  
1040 resolution of inflammation. *J Exp Med* **205**, 685-698 (2008).  
1041 58 Burkhardt, J. K., Hester, S., Lapham, C. K. & Argon, Y. The lytic granules of natural killer cells are  
1042 dual-function organelles combining secretory and pre-lysosomal compartments. *The Journal*  
1043 *of cell biology* **111**, 2327-2340, doi:10.1083/jcb.111.6.2327 (1990).  
1044 59 Sedeyn, J. C. *et al.* Histamine Induces Alzheimer's Disease-Like Blood Brain Barrier Breach and  
1045 Local Cellular Responses in Mouse Brain Organotypic Cultures. *Biomed Res Int* **937148**, 30  
1046 (2015).  
1047 60 Namba, Y., Tomonaga, M., Kawasaki, H., Otomo, E. & Ikeda, K. Apolipoprotein E  
1048 immunoreactivity in cerebral amyloid deposits and neurofibrillary tangles in Alzheimer's  
1049 disease and kuru plaque amyloid in Creutzfeldt-Jakob disease. *Brain Res.* **541**, 163-166,  
1050 doi:[https://doi.org/10.1016/0006-8993\(91\)91092-F](https://doi.org/10.1016/0006-8993(91)91092-F) (1991).  
1051 61 Wisniewski, T. & Frangione, B. Apolipoprotein E: A pathological chaperone protein in patients  
1052 with cerebral and systemic amyloid. *Neuroscience Letters* **135**, 235-238,  
1053 doi:[https://doi.org/10.1016/0304-3940\(92\)90444-C](https://doi.org/10.1016/0304-3940(92)90444-C) (1992).  
1054 62 Nakashima, Y., Plump, A. S., Raines, E. W., Breslow, J. L. & Ross, R. ApoE-deficient mice develop  
1055 lesions of all phases of atherosclerosis throughout the arterial tree. *Arteriosclerosis and*  
1056 *Thrombosis* **14**, 133-140, doi:10.1161/01.atv.14.1.133 (1994).  
1057 63 Seo, H. S. *et al.* Peripheral vascular stenosis in apolipoprotein E-deficient mice. Potential roles  
1058 of lipid deposition, medial atrophy, and adventitial inflammation. *Arterioscler Thromb Vasc Biol*  
1059 **17**, 3593-3601 (1997).  
1060 64 Rosenfeld, M. E. *et al.* Advanced atherosclerotic lesions in the innominate artery of the ApoE  
1061 knockout mouse. *Arterioscler Thromb Vasc Biol* **20**, 2587-2592 (2000).  
1062 65 Kwan, A. C., Duff, K., Gouras, G. K. & Webb, W. W. Optical visualization of Alzheimer's pathology  
1063 via multiphoton-excited intrinsic fluorescence and second harmonic generation. *Opt Express*  
1064 **17**, 3679-3689, doi:10.1364/Oe.17.003679 (2009).  
1065 66 Fricano, A., Librizzi, F., Rao, E., Alfano, C. & Vetri, V. Blue autofluorescence in protein aggregates  
1066 "lighted on" by UV induced oxidation. *Biochimica et biophysica acta. Proteins and proteomics*  
1067 **1867**, 140258, doi:10.1016/j.bbapap.2019.07.011 (2019).  
1068  
1069  
1070  
1071

1072

## Supplementary Information for

1073

1074

### **Senile plaques arise from Cathepsin D and A $\beta$ -enriched**

1075

### **proteinaceous mixtures out of hemolysis and vascular degeneration**

1076

Hualin Fu, Jilong Li, Peng Du, Weilin Jin, Guo Gao, Daxiang Cui

1077

1078

**This PDF file includes:**

1079

1080

Supplementary Fig. 1 to 4

1081

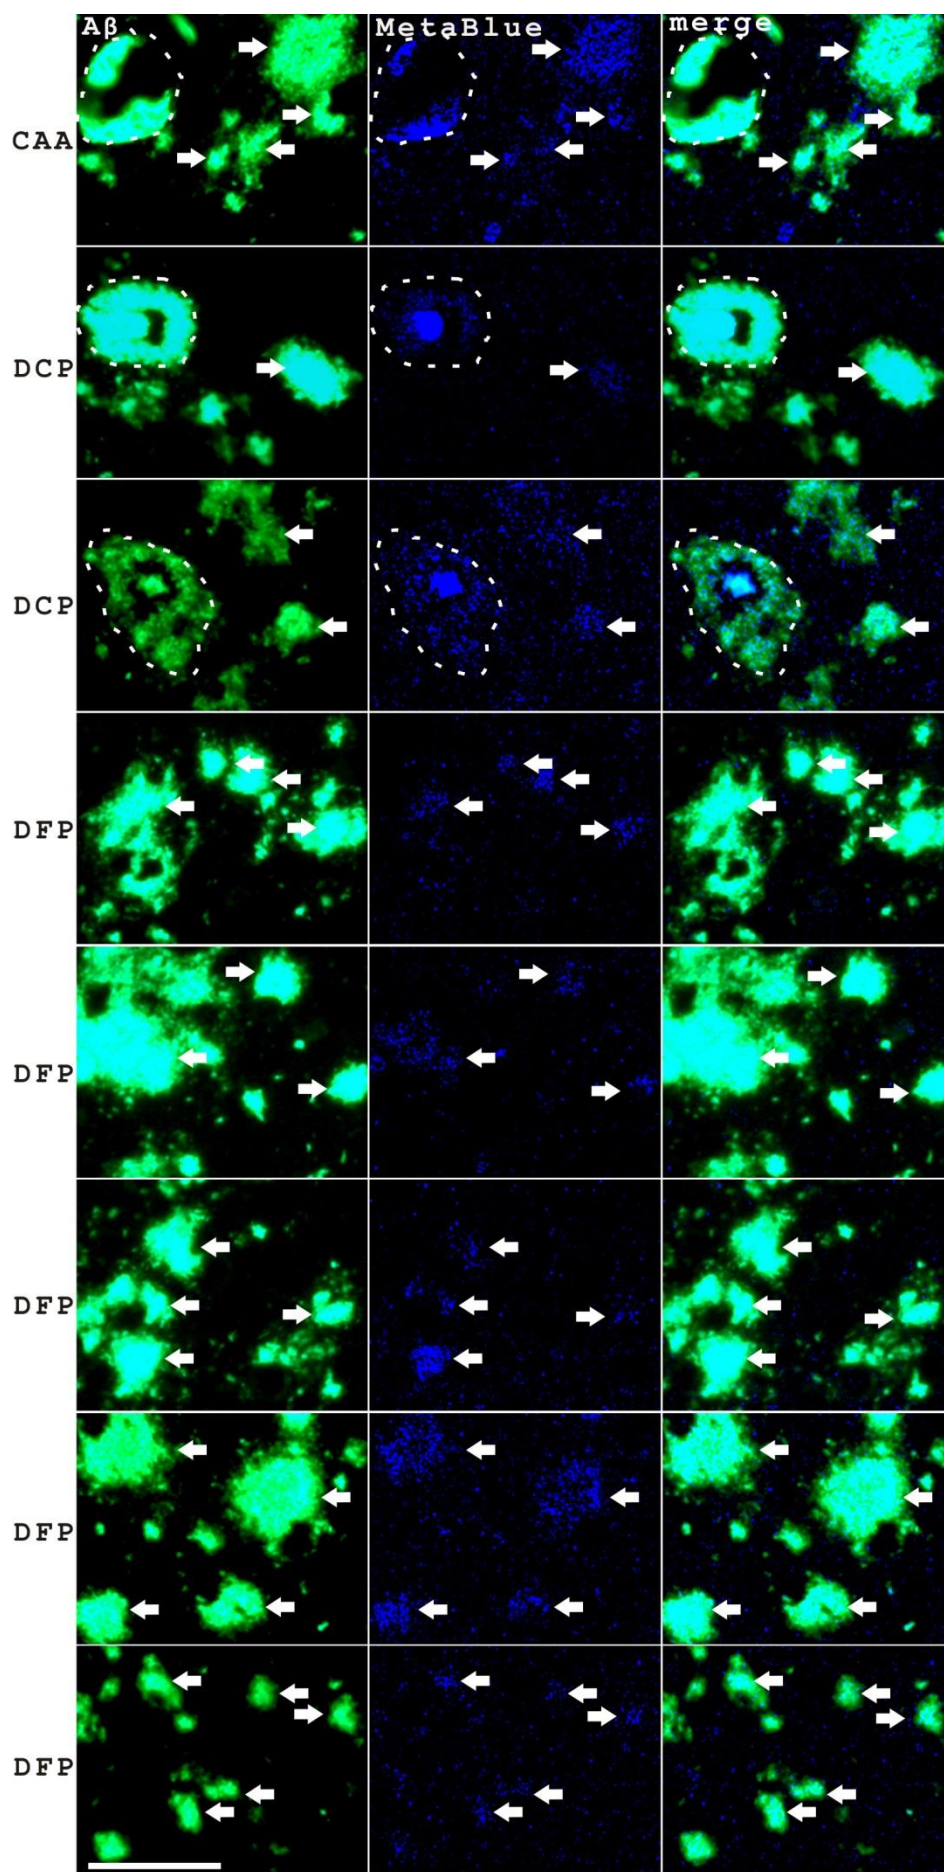



1083 **Supplementary Figure 1. MetaBlue is a robust and consistent marker of senile**  
1084 **plaques.** MetaBlue and A $\beta$  staining in CAA (top panel), dense-core plaques (second  
1085 and third panels, DCP) and in diffusive plaques (bottom five panels, DFP) was shown  
1086 in this figure. Dashed lines indicated CAA or dense-core plaques while the arrows  
1087 indicated diffusive plaques. Scale bar, 50  $\mu$ m.  
1088

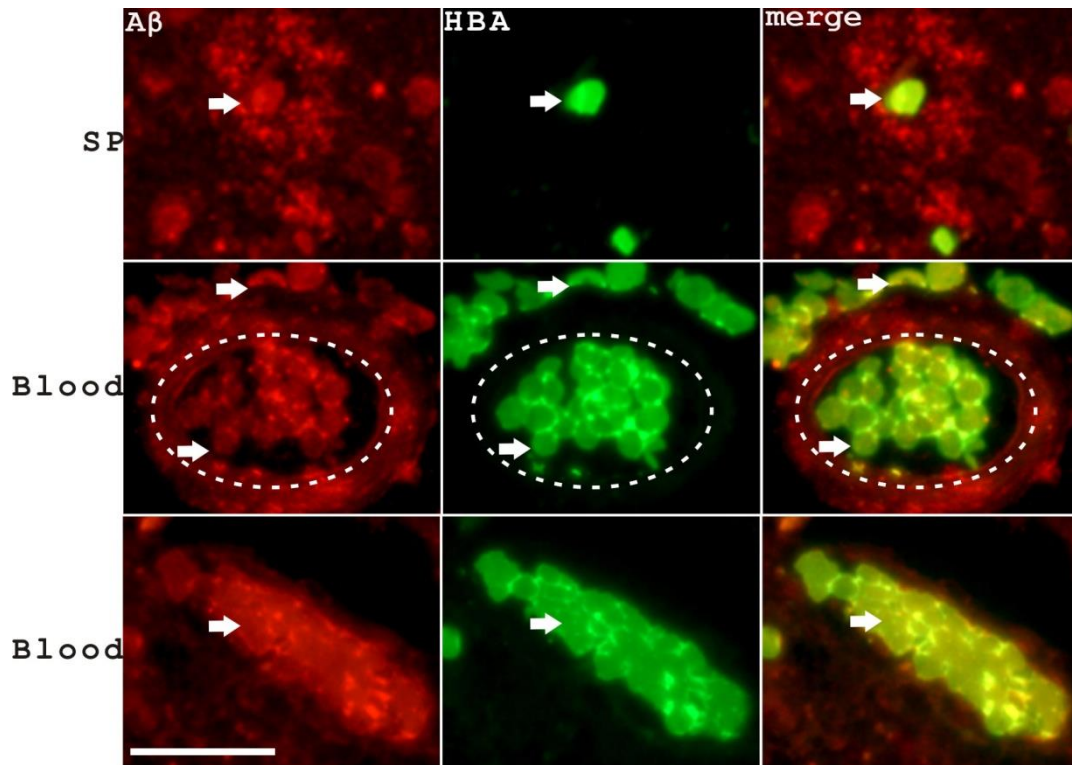

1089  
1090 **Supplementary Figure 2. The co-expression of A $\beta$  and red blood cell marker alpha**  
1091 **hemoglobin (HBA).** A $\beta$  staining of a single red blood cell marked with HBA in the  
1092 center of a senile plaque was shown in the top panel. A $\beta$  staining of red blood cells  
1093 marked with HBA during red blood cell extravasation was shown in the middle panel.  
1094 A $\beta$  staining of red blood cells marked with HBA during intravascular hemolysis with  
1095 the disappearance of clear round shape structure of red blood cells was shown at the  
1096 bottom. The arrow indicated A $\beta$  and HBA co-staining. The dashed lines indicated the  
1097 outline of a blood vessel. Scale bar, 50  $\mu$ m.  
1098

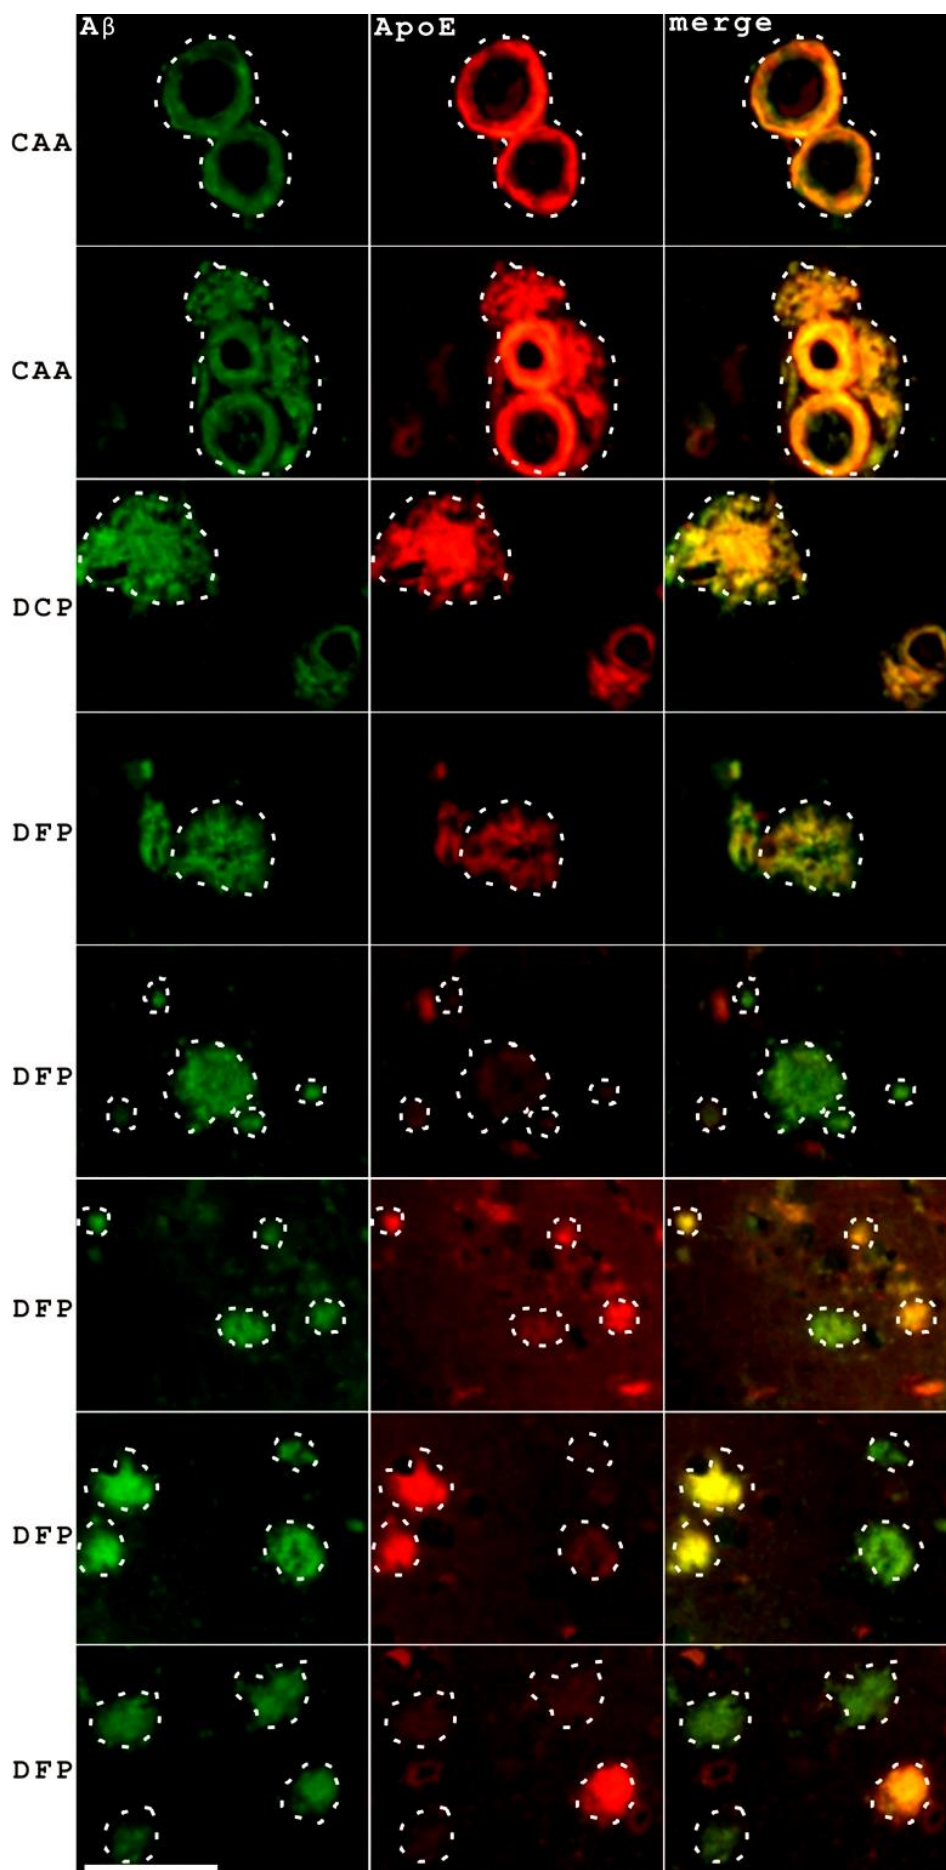



1100 **Supplementary Figure 3. ApoE is a constitutive component of senile plaques.** ApoE  
1101 and A $\beta$  staining in CAA (dashed lines, top two panels) and in a dense-core senile plaque  
1102 (dashed lines, third panel) and in diffusive senile plaques (dashed lines, bottom five  
1103 panels) was shown in this figure. ApoE and A $\beta$  staining in diffusive senile plaques with  
1104 different sizes showed highly variable ApoE intensities. Scale bar, 50  $\mu$ m.

1105

1106

1107

1108

1109

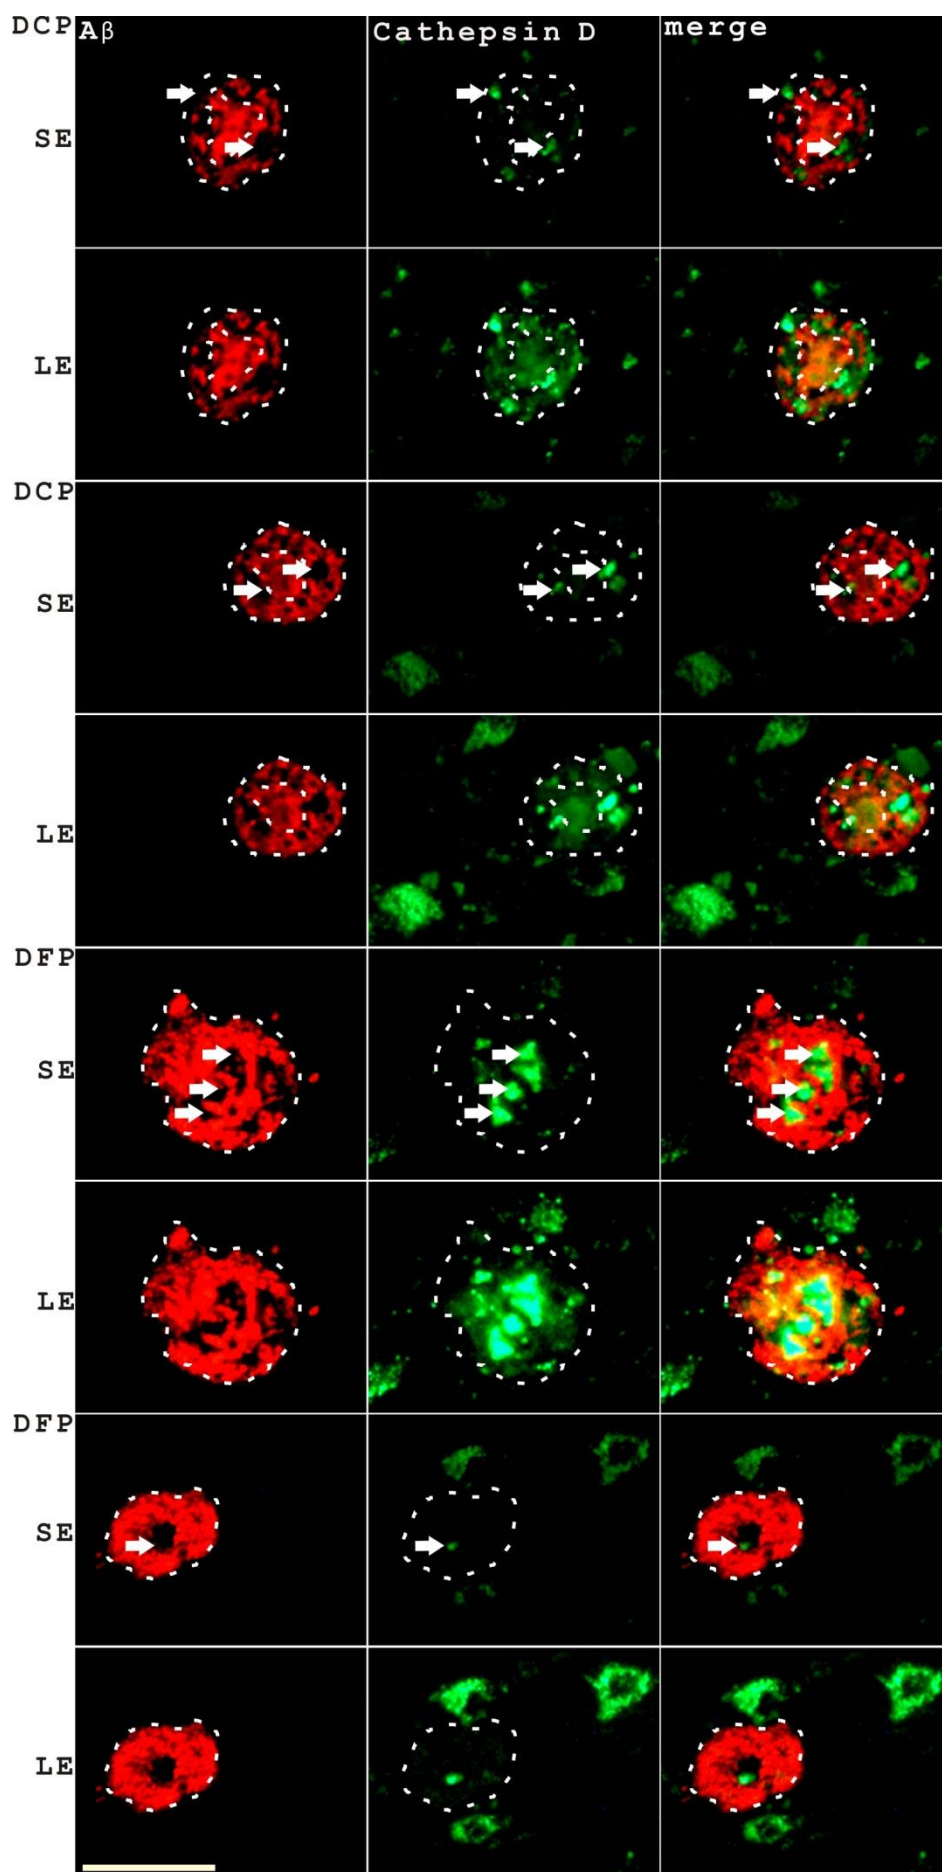

1111 **Supplementary Figure 4. The two distinct layers of Cathepsin D expression in**  
1112 **senile plaques were verified with another A $\beta$ /Cathepsin D antibody pair.** Dense-  
1113 core senile plaques showed two layers of Cathepsin D staining using two different  
1114 exposure setting of the Cathepsin D staining were shown in the top four panels (SE  
1115 stands for short exposure of 0.5 second while LE stands for long exposure of 1 second).  
1116 A diffusive senile plaque with two layers of Cathepsin D staining was shown in the fifth  
1117 and sixth panels. A diffusive senile plaque with very weak plaque A $\beta$ -overlapping  
1118 Cathepsin D staining was shown in the bottom two panels. The arrows pointed to the  
1119 strong granule type of Cathepsin D staining while the dashed lines indicated the weaker  
1120 but constitutive Cathepsin D staining overlapping with senile plaque A $\beta$  staining. Scale  
1121 bar, 50  $\mu$ m.  
1122
